# The M1 aminopeptidase NPEPPS is a novel regulator of cisplatin sensitivity

Robert T. Jones<sup>1,15</sup>, Andrew Goodspeed<sup>1,3,15</sup>, Maryam C. Akbarzadeh<sup>2,4,16</sup>, Mathijs Scholtes<sup>2,16</sup>, Hedvig Vekony<sup>1</sup>, Annie Jean<sup>1</sup>, Charlene B. Tilton<sup>1</sup>, Michael V. Orman<sup>1</sup>, Molishree Joshi<sup>1,5</sup>, Teemu D. Laajala<sup>1,6</sup>, Mahmood Javaid<sup>7</sup>, Eric T. Clambey<sup>8</sup>, Ryan Layer<sup>7,9</sup>, Sarah Parker<sup>10</sup>, Tokameh Mahmoudi<sup>2,11</sup>, Tahlita Zuiverloon<sup>2,\*</sup>, Dan Theodorescu<sup>12,13,14,\*</sup>, James C. Costello<sup>1,3,\*</sup>

<sup>1</sup>Department of Pharmacology, University of Colorado Anschutz Medical Campus, Aurora, CO, USA

<sup>2</sup>Department of Urology, Erasmus MC Cancer Institute, Erasmus University Medical Center Rotterdam, Rotterdam, The Netherlands

<sup>3</sup>University of Colorado Comprehensive Cancer Center, University of Colorado Anschutz Medical Campus, Aurora, CO, USA

<sup>4</sup>Stem Cell and Regenerative Medicine Center of Excellence, Tehran University of Medical Sciences, Tehran, Iran

<sup>5</sup>Functional Genomics Facility, University of Colorado Anschutz Medical Campus, Aurora, CO, USA

<sup>6</sup>Department of Mathematics and Statistics, University of Turku, Turku, Finland.

<sup>7</sup>Computer Science Department, University of Colorado, Boulder

<sup>8</sup>Department of Anesthesiology, University of Colorado Anschutz Medical Campus, Aurora, CO

<sup>9</sup>BioFrontiers Institute, University of Colorado, Boulder

<sup>10</sup>Heart Institute & Advanced Clinical Biosystems Research Institute, Cedars Sinai Medical Center, Los Angeles, California 90048, United States

<sup>11</sup>Erasmus MC, Department of Biochemistry, Rotterdam, The Netherlands

<sup>12</sup>Department of Surgery, Cedars-Sinai Medical Center, Los Angeles, CA, USA

<sup>13</sup>Department of Pathology and Laboratory Medicine, Cedars-Sinai Medical Center, Los Angeles, CA, USA

<sup>14</sup>Cedars-Sinai Samuel Oschin Comprehensive Cancer Institute, Los Angeles, CA, USA

<sup>15</sup>These authors contributed equally

<sup>16</sup>These authors contributed equally

\*Corresponding Authors

## Corresponding Authors

Tahlita Zuiverloon, MD, PhD

Department of Urology

Erasmus MC Cancer Institute, Erasmus University Medical Center

Dr. Molewaterplein 40

3015GD, Rotterdam

The Netherlands

+31 6 26 41 90 87

[t.zuiverloon@erasmusmc.nl](mailto:t.zuiverloon@erasmusmc.nl)

Dan Theodorescu, MD, PhD

Department of Surgery and Pathology

Cedars-Sinai Medical Center

8700 Beverly Blvd.

OCC Mezz C2002

Los Angeles, CA 90048

50 +1 (310) 423-8431

51 [dan.theodorescu@cshs.org](mailto:dan.theodorescu@cshs.org)

52

53 James C Costello, PhD

54 Department of Pharmacology

55 University of Colorado Anschutz Medical Campus

56 Mail Stop 8303

57 12801 E. 17th Ave., Rm L18-6114

58 Aurora, CO 80045

59 +1 (303) 724-8619

60 [james.costello@cuanschutz.edu](mailto:james.costello@cuanschutz.edu)

61

## 62 **HIGHLIGHTS**

63

- 64 • CRISPR screens with multi-omics identify NPEPPS as a driver of cisplatin resistance
- 65 • NPEPPS depletion in multiple bladder cancer models enhances cisplatin sensitivity
- 66 • LRRC8A and LRRC8D loss increase resistance to cisplatin in CRISPR screens
- 67 • Unique resource of functional and multi-omic data is provided to the community

68

69

## 70 **KEY WORDS**

71

72 Bladder Cancer, CRISPR Screen, Synthetic Lethality, Genomics, Transcriptomics, Proteomics,

73 DNA Repair, Cisplatin, Chemotherapy, NPEPPS, Volume Regulated Anion Channel, VRAC,

74 LRRC8A, LRRC8D, Tosedostat

75

76 **ABSTRACT**

77

78 Platinum-based chemotherapeutics are used in many combination regimens in cancer. Despite  
79 extensive use across diverse cancer types, there is room for improved efficacy and patient  
80 selection for treatment. Here, we use bladder cancer to address both issues. A multi-omic  
81 assessment of five human bladder cancer cell lines and their chemotherapy resistant  
82 derivatives, coupled with *in vitro* whole-genome CRISPR screens were used to define functional  
83 drivers of treatment resistance. We identified 46 genes that sensitized the resistant cell lines to  
84 cisplatin plus gemcitabine (GemCis), a standard combination therapy in bladder cancer. Most  
85 genes were involved with DNA damage and repair pathways, which have previously been  
86 associated with enhanced sensitivity to cisplatin. Evaluating expression of the 46 genes in the  
87 whole transcriptome and proteome data in parental and resistant lines identified the puromycin  
88 sensitive aminopeptidase, NPEPPS, as a novel hit. Depletion of NPEPPS resulted in sensitizing  
89 resistant bladder cancer cells to cisplatin *in vitro* and in xenograft experiments. Pharmacologic  
90 inhibition of NPEPPS with tosedostat in cells and in chemoresistant, bladder cancer patient  
91 tumor-derived organoids improved response to cisplatin. Prior work found NPEPPS in a protein  
92 complex with volume regulated anion channels (VRACs) in several cell line models.  
93 Interestingly, depletion of two VRAC subunits, LRRC8A and LRRC8D, known importers of  
94 intracellular cisplatin, enhanced resistance to cisplatin. Our findings support NPEPPS as a novel  
95 and druggable driver of cisplatin resistance with the potential for rapid translation to clinical  
96 investigation.

97

## 98 INTRODUCTION

99

100 Platinum-based chemotherapeutics have a long history (Dilruba and Kalayda, 2016) with  
101 successful applications in testicular, ovarian, bladder, head and neck, and lung cancers.  
102 However, these drugs come with dose-dependent side effects that limit patient eligibility.  
103 Additionally, chemoresistance mechanisms can arise, reducing the efficacy of these drugs.  
104 While mechanisms of resistance have long been established, including DNA damage repair and  
105 drug export (Galluzzi et al., 2012), other mechanisms, such as the import of platinum drugs  
106 through volume regulated anion channels (VRACs) are more recently discovered and present  
107 new opportunities for therapeutic development (Planells-Cases et al., 2015a; Rottenberg et al.,  
108 2021). Despite their limitations, platinum-based drugs remain the standard of care in many  
109 cancer types and with a paucity of better treatment options for many patients, these drugs will  
110 remain in use for the foreseeable future. Two avenues can be taken to improve patient  
111 outcomes, which include discovery of more effective agents or development of strategies that  
112 can improve efficacy of platinum-based regimens. The latter would have broad impact across a  
113 range of cancer types. Here we focus on the latter approach and use bladder cancer as the  
114 model.

115

116 Bladder cancer (BCa) accounts for 430,000 new diagnoses and 170,000 deaths worldwide  
117 annually (Bray et al., 2018). Cisplatin-based combination chemotherapy, in the form of  
118 gemcitabine plus cisplatin (GemCis) or Methotrexate, Vinblastine, Adriamycin, and Cisplatin  
119 (MVAC), remains the first-line, standard of care for metastatic BCa, providing a 5-10% cure rate.  
120 However, up to 30% of patients are ineligible for cisplatin-based treatment (Galsky et al., 2018)  
121 and are offered carboplatin-based combinations. Unfortunately carboplatin combination therapy  
122 has been shown to be less effective in BCa (Patel et al., 2020). Alternatively, immune  
123 checkpoint therapies (ICT) are being considered as a first-line therapy (Galsky et al., 2020);  
124 however, ICT requires a PD-L1 diagnostic test, for which only ~25% patients meet eligibility  
125 (Nadal and Bellmunt, 2019). The complete response rates for ICT eligible patients is 20-30%  
126 (Balar et al., 2017a, 2017b). Cisplatin-based combination chemotherapy is also standard of care  
127 in the neoadjuvant (NAC) setting for the management of localized muscle-invasive bladder  
128 cancer (Grossman et al., 2003; Vale, 2005). However, NAC adoption has been relatively slow  
129 due to the toxicity of the drugs, the number of patients that are cisplatin ineligible, and the  
130 relatively small survival benefit of 5-15% over immediate cystectomy (Witjes et al., 2020).  
131 Importantly, in both the metastatic and NAC BCa settings, patient selection and therapeutic  
132 efficacy of cisplatin-based chemotherapy are critical unresolved challenges (Patel et al., 2020).

133

134 Recently, several large-scale efforts have performed whole genome loss-of-function screening  
135 across hundreds of cancer cell lines using CRISPR- and shRNA-based libraries to define pan-  
136 cancer and context-specific genetic dependencies (Cowley et al., 2014; McDonald et al., 2017;  
137 Tsherniak et al., 2017; Behan et al., 2019). A limitation of these efforts in pharmacogenomics is  
138 that cells were grown under basal growth conditions in the absence of treatment. Additionally,  
139 those studies were performed in cell lines that had not acquired resistance to the treatment. To  
140 better understand the functional drivers of therapeutic resistance, such screens must be done in  
141 the presence and absence of the therapy of interest (Goodspeed et al., 2019; Huang et al.,  
142 2020; Jost and Weissman, 2018; Olivieri et al., 2020), and in cells that have acquired resistance  
143 to the treatment itself. Results from such synthetic lethal screens can be used to prioritize gene  
144 candidates that can be targeted to overcome treatment resistance.

145

146 In this study, we harnessed the power of CRISPR-based synthetic lethal screening and multi-  
147 omic profiling to systematically assess the functional determinants of sensitivity to the treatment  
148 regimen of gemcitabine plus cisplatin in a panel of chemoresistant BCa cell lines (**Figure 1A**). In



149 addition to known mechanisms, we present the finding that upregulation of puromycin-sensitive  
150 aminopeptidase, NPEPPS, is a novel mechanism of gemcitabine plus cisplatin resistance,  
151 specifically affecting cisplatin sensitivity. We provide validations of these findings *in vitro* and *in*  
152 *vivo*. We next show that pharmacological inhibition of NPEPPS through an orally deliverable,  
153 well-tolerated drug, tosedostat, re-sensitizes resistant cells to cisplatin treatment in BCa cell  
154 lines and organoids derived from patient tumors that did not response to cisplatin-based  
155 chemotherapy .We also provide a unique resource to the community, an R Shiny app for broad  
156 comparisons between datasets (CRISPR screens and multi-omic) and cell lines, along with  
157 individual gene queries and basic plotting functionality  
158 ([https://bioinformatics.cuanschutz.edu/GC\\_Visualization/](https://bioinformatics.cuanschutz.edu/GC_Visualization/)).  
159

## 160 RESULTS

161  
162 From the Resistant Cancer Cell Line (RCCL) collection (Vallo et al., 2015, 2017), we obtained  
163 five human BCa cell lines, KU1919, 5637, T24, TCCSUP, and 253J. For each, we obtained the  
164 parental lines (-Par) and their matched derivatives that were made resistant through dose  
165 escalation to cisplatin (-Cis), gemcitabine (-Gem), and gemcitabine plus cisplatin (-GemCis)  
166 concurrently (**Figure 1A; Table S1**). We confirmed resistance to the associated drugs for all  
167 resistant derivatives in comparison to the parental lines and found them to be consistent with  
168 those reported by RCCL (**Figure S1**) (Vallo et al., 2015, 2017). These cells represent features  
169 and alterations in putative BCa drivers as reported in TCGA (Robertson et al., 2017) and  
170 variants reported in ClinVar (Landrum et al., 2018) (**Tables 1, S2 and S3**).  
171

### 172 Genome-wide CRISPR screens identify 46 common synthetic lethal genes

173  
174 To study the connection between drug resistance and genes, we performed whole-genome  
175 loss-of-function screens in each of the five GemCis-resistant cell line derivatives. After  
176 transduction of the Brunello CRISPR-Cas9 knockout library (Doench et al., 2016a), we  
177 passaged the cells for 10 days to clear essential genes, then split into saline (PBS) or  
178 gemcitabine plus cisplatin treatment groups (**Figure 1A**). Each screen was performed at a drug  
179 concentration that allowed the GemCis-resistant cells to grow unrestricted, but which  
180 significantly inhibited the growth of the associated parental lines (**Table S1**). Screening  
181 parameters for each cell line are reported in **Table S4**. We measured sgRNAs 19 and 25 after  
182 transduction, which were 9 and 15 days after the start of treatment.  
183

184 We defined genes as “synthetic lethal” with gemcitabine plus cisplatin treatment as those for  
185 which the combined cognate sgRNA counts were significantly lower (moderated t-test, FDR <  
186 0.05) in the gemcitabine plus cisplatin-treated arm compared to the PBS arm when including  
187 both days 19 and 25 in the statistical model (**Table S5**). We identified 235 synthetic lethal genes  
188 that were significant in KU1919-GemCis, 888 for T24-GemCis, 2099 for TCCSUP-GemCis,  
189 2369 for 253J-GemCis, and 511 for 5637-GemCis. Next, we performed gene set enrichment  
190 analysis (Korotkevich et al., 2019) on the full ranked list of genes according to their synthetic  
191 lethality. For this analysis, we combined the results to create one ranked gene list by including  
192 each of the five cell types in the statistical model directly. As expected, we found that the top  
193 ranked pathways were dominated by processes such as DNA repair, Fanconi Anemia,  
194 nucleotide excision repair, double-stranded break repair, base-excision repair, and DNA  
195 damage bypass mechanisms (**Figure 1B and Table S6**). These results are consistent with the  
196 known roles of DNA damage detection and repair in cisplatin resistance (Drayton and Catto,  
197 2012; Galluzzi et al., 2012).  
198

199 Next, we sought to identify the most robust and commonly synthetic lethal candidate genes by  
200 identifying only those significant in all 5 cell lines (**Figures 1C and S2**). Of the 46 commonly  
201 synthetic lethal genes, and illustrated in **Figure 1D**, some increased cell growth in PBS  
202 treatment, then reduced growth in gemcitabine plus cisplatin treatment. Other genes had very  
203 little impact on cell growth in PBS treatment, but then reduced growth when treated with  
204 gemcitabine plus cisplatin. Finally, some genes reduced cell growth in PBS treatment and  
205 further reduced growth with gemcitabine plus cisplatin treatment. As expected, nearly all 46  
206 common synthetic lethal candidate genes fell into DNA damage response and repair pathways.

## 207 **NPEPPS is a novel determinant of response to cisplatin**

208

209 A recent systematic analysis of hundreds of CRISPR screens in cancer cell lines with  
210 comprehensive multi-omic profiling demonstrated that transcript expression markers were the  
211 best predictors of gene dependency (Dempster et al., 2020), providing rationale for the use of  
212 pre-treatment -omic profiling as a means to study the biological impact of synthetic lethal hits.  
213 Hence, to prioritize the 46 common synthetic lethal genes for validation and detailed  
214 mechanistic understanding, we performed RNA sequencing and mass spectrometry-based  
215 proteomic profiling on cell lysates of all cell lines grown in drug-free media (**Figure 1A**).

216

217 We investigated the transcriptome and proteome data by comparing parental to matched drug  
218 resistant derivative lines (-Gem, -Cis, and -GemCis) and identified several known mechanisms  
219 of chemoresistance. For example, acquired resistance to gemcitabine follows a number of  
220 common pathways across multiple tumor types that disrupt intracellular metabolism, such as the  
221 loss of deoxycytidine kinase (DCK) or increased expression of ribonucleotide reductase subunit  
222 M1 (RRM1) (Bepler et al., 2006; Bergman et al., 2005; Jordheim et al., 2011) (**Figure S3A**). Our  
223 data shows that RRM1 is specifically and significantly upregulated in nearly all Gem- and  
224 GemCis-resistant derivatives in the T24, TCCSUP, KU1919, and 5637 cell line series by both  
225 RNA and protein expression. In addition, and with the TCCSUP-GemCis line being the only  
226 exception, we found RRM1 copy number amplified, but not in the parental or the cisplatin  
227 resistant cells, providing strong support that a robust and consistently acquired mechanism of  
228 gemcitabine resistance in these cells is the copy number amplification and subsequent  
229 upregulation of RRM1 (**Figure S3B**). RRM1 is defined as an essential gene in the Dependency  
230 Map (Tsherniak et al., 2017), which we also detected in our screen (**Table S7**). Interestingly, in  
231 253J-Gem and 253J-GemCis cell lines, which had minor changes in RRM1 expression, DCK  
232 expression was lost at the RNA and protein level with these results being supported by a copy  
233 number loss specific to these cells (**Figure S3B**).

234

235 Next, we analyzed gene and protein expression together while treating the cell line as a  
236 covariate in the statistical model. We found 1557 significantly upregulated genes across the  
237 Gem-resistant lines, 1897 in the Cis-resistant lines, and 1530 in the GemCis-resistant lines  
238 (moderated t-test, FDR < 0.05; **Table S8**). The proteomics data revealed 9 significantly  
239 upregulated proteins across the Gem-resistant cell lines, 1 in the Cis-resistant cell lines, and 10  
240 in the GemCis-resistant cell lines (moderated t-test, FDR < 0.25; **Table S9**). Given the lower  
241 number of significant proteins and the relevance of transcript expression in predicting genetic  
242 dependency (Dempster et al., 2020), we first investigated the overlap between the CRISPR  
243 screen results and the transcriptomes from each of the resistant cell line derivatives compared  
244 to the parental cells. Few genes were significantly and consistently upregulated across the  
245 resistant derivatives in the list of 46 commonly synthetic lethal genes (**Figure 2A**). The most  
246 significantly and consistently upregulated genes were involved in DNA damage response and  
247 repair mechanisms, including ERCC6, XPA, REV1, POLH, ERRC8, PRIMPOL, NBN, and  
248 members of the Fanconi Anemia pathway. Puromycin sensitive aminopeptidase, NPEPPS, was  
249 identified as being the most consistently upregulated gene across the resistant derivatives  
250 (**Figure 2A, B**). We similarly found protein levels to be consistently and significantly upregulated  
251 (**Figure 2C**). NPEPPS was also a top synthetic lethal hit (**Figure 2D and Table S5**). Consistent  
252 with the proteomics results, immunoblotting for NPEPPS revealed that it was upregulated in the  
253 Cis-resistant and GemCis-resistant lines, with the Gem-resistant lines showing variable  
254 upregulation (**Figure 2E**).

255

256 We examined an independent whole-genome CRISPR screen that tested 27 general genotoxic  
257 agents (Olivieri et al., 2020) and here report new findings in support of NPEPPS as a novel  
258 mediator of cisplatin resistance. We found that cells with NPEPPS loss were specifically  
259 depleted in response to cisplatin, but not gemcitabine (**Figure 3A**). This result strongly supports  
260 the robustness of our findings as Olivieri et al. used different CRISPR libraries (TKOv2 and  
261 TKOv3) and cell line (retinal pigment epithelium-1, RPE1). Moreover, our screen results for all  
262 five cell lines were highly correlated with the three cisplatin screens (**Figure S4A**). Strikingly,  
263 nearly all 46 hits were significant hits associated with cisplatin, but not gemcitabine in Olivieri et  
264 al. (**Figure S4B**).

265  
266 To validate our screen findings that NPEPPS depletion enhances sensitivity to gemcitabine plus  
267 cisplatin treatment in GemCis-resistant BCa cells, and parse its role in both cisplatin and  
268 gemcitabine resistance, we generated stable NPEPPS shRNA knockdowns in the KU1919-  
269 GemCis cell line (**Figure 3B**). The KU1919-GemCis line was selected for further experiments  
270 throughout this work because it had the strongest combination of a synthetic lethal result and  
271 gene/protein upregulation (**Figure 2**). We found that NPEPPS knockdown preferentially  
272 increased cisplatin, but not gemcitabine sensitivity (**Figure 3C, D**). The same result was found  
273 using siRNA in the KU1919-GemCis cell line and shRNA and/or siRNA in T24-GemCis and  
274 253J-GemCis cells (**Figure S5**). We also found NPEPPS mRNA increased with cisplatin  
275 treatment in both KU1919-parental and KU1919-GemCis cells after 24 hours of treatment  
276 (**Figure 3E**). These results indicate that NPEPPS mediates sensitivity to gemcitabine plus  
277 cisplatin primarily by its effect on resistance to cisplatin.

278  
279 Several agents inhibit NPEPPS activity (Drinkwater et al., 2017). Tosedostat, an orally available  
280 M1 aminopeptidase prodrug has antileukemic activity with a favorable toxicity profile in patients  
281 (CHR-2797, CAS 238750-77-1) (Cortes et al., 2013; van Herpen et al., 2010; Krige et al., 2008;  
282 Löwenberg et al., 2010; Mawad et al., 2016). We tested the response of the KU1919-GemCis,  
283 T24-GemCis, and TCCSUP-GemCis resistant cells to serial doses of tosedostat at the resistant  
284 doses of gemcitabine, cisplatin, and gemcitabine plus cisplatin. Consistent with NPEPPS  
285 depletion, tosedostat did not sensitize cells to gemcitabine (**Figure 3F** and **Table S1**). The  
286 strongest combined effect was seen with cisplatin and gemcitabine plus tosedostat treatment  
287 (**Figure S6**). These results show that GemCis-resistant BCa cells can be re-sensitized to  
288 cisplatin-based treatments at varying degrees by genetic and pharmacologic inhibition of  
289 NPEPPS.

## 290 291 **Volume regulated anion channels and their impact on chemoresistance in bladder** 292 **cancer cells**

293  
294 NPEPPS is one of 13 M1 aminopeptidases that cleaves amino acids from the N-terminus of  
295 polypeptides. NPEPPS is involved in cell growth, development and antigen presentation  
296 (Constam et al., 1995; Menzies et al., 2010; Saric et al., 2004; Towne et al., 2008). A role of  
297 NPEPPS in chemotherapeutic response is yet to be described. To begin characterizing the  
298 mechanisms NPEPPS uses to drive cisplatin resistance, we investigated NPEPPS protein  
299 interaction partners in the BioPlex interactome, a database that has collected affinity-purification  
300 mass spectrometry measurements of systematically over-expressed, tagged proteins (Huttlin et  
301 al., 2020). Remarkably, among the small number of proteins that were observed to interact with  
302 NPEPPS, were all five members of the volume regulated anion channel (VRAC), leucine rich  
303 repeat containing 8 VRAC subunit A-E (LRRC8A-E) (**Figure 4A**). Supporting this finding, other  
304 affinity-purification mass spectrometry experiments independently reported the interaction  
305 between NPEPPS and VRAC members across different cell lines (Kasuya et al., 2018; Syeda et

306 al., 2016). Equally interesting was that none of the other 12 M1 aminopeptidases were found in  
307 complex with any VRAC members in the BioPlex interactome.

308  
309 VRACs directly respond to osmotic stress by trafficking osmolytes such as chlorine, potassium,  
310 and taurine, across the plasma membrane to regulate cell volume (Voss et al., 2014).  
311 Importantly, subunits LRRC8A and LRRC8D are mediators of platinum drug resistance in  
312 chronic myelogenous leukemia cells. Knockout experiments in kidney and colorectal cell lines  
313 showed that 50-70% of intracellular cisplatin is transported through these channels (Planells-  
314 Cases et al., 2015a), mediated by LRRC8A and LRRC8D. Similar findings were subsequently  
315 found in ovarian cancer and alveolar carcinoma cell lines (Sørensen et al., 2014, 2016a,  
316 2016b). Thus, we focus on the LRRC8A and LRRC8D subunits for further analysis.

317  
318 We revisited our CRISPR screens and RNAseq data to determine if loss of LRRC8A and/or  
319 LRRC8D impacted cisplatin resistance. As predicted, LRRC8A and LRRC8D loss provided a  
320 growth advantage to cells treated with gemcitabine plus cisplatin (**Figure 4B, C**). Most strikingly,  
321 LRRC8A was the 1<sup>st</sup> and LRRC8D was the 11<sup>th</sup> ranked gene that when lost provided a growth  
322 advantage in gemcitabine plus cisplatin treatment (**Figure 4D**). LRRC8A and/or LRRC8D  
323 mRNA expression was reduced for most of the Cis- or GemCis-resistant cell lines, with the  
324 Gem-resistant lines showing variable differential expression (**Figure 4E, F**). Most notable,  
325 LRRC8D gene expression in the TCCSUP-Cis and TCCSUP-GemCis cells was completely lost  
326 (**Figure 4F**). We found that in these cell lines, there is a deep deletion at the LRRC8D locus  
327 (**Figure S7**). NPEPPS loss in the TCCSUP-GemCis lines showed the weakest synthetic lethal  
328 result compared to the other four GemCis-resistant lines (**Figure 2D**) and LRRC8D loss had no  
329 effect on TCCSUP-GemCis growth (**Figure 4C**), while LRRC8A loss did in fact increase growth  
330 (**Figure 4B**). Taken together, these data support a functional dependency between NPEPPS  
331 and VRAC subunits LRRC8A and LRRC8D in relation to cisplatin resistance.

332  
333 Given that VRACs transport cisplatin and carboplatin (Planells-Cases et al., 2015a) and finding  
334 NPEPPS in complex with LRRC8A and LRRC8D (Huttlin et al., 2020; Kasuya et al., 2018;  
335 Syeda et al., 2016), we hypothesized that NPEPPS may be a negative regulator of VRAC  
336 activity, consequently reducing import of intracellular cisplatin. Thus, we tested the impact of  
337 NPEPPS on osmolytes known to be transported through VRACs. NPEPPS knockdown in  
338 KU1919-GemCis-shN39 cells resulted in a significantly lower levels of intracellular taurine,  
339 hypotaurine, creatine, phosphocreatine, and several other amino acids (**Figure 4G** and **Table**  
340 **S10**), which are known to be exported via VRACs. In addition, intracellular levels of taurine were  
341 reduced even further when cells with knockdown of NPEPPS were also treated with 10 $\mu$ M  
342 cisplatin, which is the resistance dose for the KU1919-GemCis cells (**Figure 4H**). This suggests  
343 that cisplatin further stimulates channel activity when NPEPPS is decreased, which allows for  
344 increased export of taurine, and as we show next increases cisplatin import.

345  
346 To evaluate NPEPPS impact on cisplatin import, we directly measured intracellular cisplatin  
347 using the metal ion detection capabilities of mass cytometry (Chang et al., 2015). Intracellular  
348 cisplatin was measured after 4 hours of treatment at 10 $\mu$ M for KU1919-parental, KU1919-  
349 GemCis, and KU1919-GemCis-shN39 cells. As expected, KU1919-GemCis cells showed  
350 decreased uptake of cisplatin compared to KU1919-parental cells. Knockdown of NPEPPS  
351 shifted the intracellular levels of cisplatin to be nearly double (median Pt 195 = 77) of the  
352 GemCis-resistant cells (median Pt 195 = 44.5) and half of the parental cells (median Pt 195 =  
353 158), suggesting that NPEPPS depletion allows increased import of cisplatin (**Figure 4I** and  
354 **S8A,B**).

355



356 Furthermore, we measured protein levels of LRRC8A and LRRC8D after 48 hours of PBS or  
357 10 $\mu$ M cisplatin treatment in NPEPPS knockdown or nontargeting control KU1919-GemCis cells.  
358 Supporting the mass cytometry results (**Figure 4I**) and the result that taurine is exported at a  
359 higher rate upon cisplatin stimulation in the KU1919-GemCis-shN39 cells (**Figure 4H**), NPEPPS  
360 knockdown increased DNA damage as measured by increased  $\gamma$ H2AX foci (**Figure 4J** and  
361 **S8C**). However, we did not find major changes in LRRC8A or LRRC8D expression in response  
362 to NPEPPS knockdown or cisplatin treatment (**Figure 4J** and **S8C**). Taken together, these data  
363 and previous studies, support a role for NPEPPS in regulating cellular osmolyte homeostasis via  
364 an interaction with VRACs.

365

## 366 **Genetic and pharmacologic inhibition of NPEPPS enhances chemotherapy** 367 **sensitivity *in vivo* and in patient tumor-derived organoids**

368

369 To test if NPEPPS depletion would sensitize tumor cells to gemcitabine plus cisplatin treatment  
370 *in vivo*, we established subcutaneous xenografts using the KU1919-GemCis cells with either  
371 NPEPPS shRNA knockdown or non-targeting shRNA control. When tumors reached roughly  
372 200mm<sup>3</sup>, mice were randomized into four groups: shCtrl1 with PBS, shCtrl1 with gemcitabine  
373 plus cisplatin, shN39 with PBS, and shN39 with gemcitabine plus cisplatin. Treatment was  
374 delivered through intraperitoneal injection, with PBS or gemcitabine plus cisplatin administered  
375 three times weekly for four weeks. Tumor volumes were monitored until they reached the  
376 predetermined endpoint of 2cm<sup>3</sup>. NPEPPS knockdown alone and gemcitabine plus cisplatin  
377 treatment alone had significant impact on tumor growth compared to vehicle-treated, shRNA  
378 controls. The combination of NPEPPS knockdown and gemcitabine plus cisplatin treatment led  
379 to an even stronger and more significant impact on tumor growth (**Figure 5A**). We further  
380 analyzed tumor growth using linear mixed-effects models aimed at capturing trends in tumor  
381 volume change in relation to pre-treatment baseline tumor volume across the four groups.  
382 According to this model, tumor growth inhibition by NPEPPS knockdown ( $p=0.00178$ ), GemCis  
383 treatment ( $p=5.49e-7$ ), or the combination of NPEPPS knockdown and gemcitabine plus  
384 cisplatin treatment ( $p=1.47e-8$ ) were all consistent effects over the treatment period (**Figure**  
385 **S9A, B**). We validated NPEPPS knockdown in the pre-xenograft inoculate cells and after  
386 tumors were removed from mice upon reaching the 2cm<sup>3</sup> endpoint (**Figure S9C**). Survival  
387 analysis using tumor volume as the endpoint showed that mice treated with gemcitabine plus  
388 cisplatin had a 14-day survival advantage. Similarly, knockdown of NPEPPS resulted in a 14-  
389 day survival advantage. Mice treated with gemcitabine plus cisplatin and with NPEPPS  
390 knockdown tumors had a 25-day survival advantage, a statistically significant improvement  
391 (Logrank test,  $p<0.0001$ ) (**Figure 5B**).

392

393 Next, we extended our work to evaluate the impact of the drug combination of tosedostat and  
394 cisplatin on *ex vivo* patient tumor-derived BCa organoids. We generated three independent  
395 organoid models from patient cystectomy samples that did not respond to gemcitabine plus  
396 cisplatin NAC (**Figure S10A**). Based on targeted mutations or global copy number alterations,  
397 the organoids had similar characteristics of the tumor tissues from which they were derived  
398 (**Figure S10B, C**). We treated the organoids with cisplatin and tosedostat for six days and then  
399 removed the drugs to allow recovery for 10 days (**Figure S10D**). Cisplatin with tosedostat  
400 resulted in significant decreases in viability across all organoids (**Figures S11-S13**). Viability of  
401 vehicle control and tosedostat treated organoids show an initial decrease of roughly 20%, but  
402 these cells recover over time to be equal to the vehicle control. We saw no difference in 5 $\mu$ M or  
403 20 $\mu$ M tosedostat (**Figure S11D**). After 10 days of recovery from treatment, organoids were  
404 reseeded at different densities based on overall growth and allowed to re-establish and grow for  
405 an additional 6 days, then cell viability was assessed (**Figures 5C-E** and **S11-13**). Treatment

406 with increasing concentrations of Cis alone resulted in a progressively decreased viability of  
407 organoids. Strikingly, the addition of tosedostat to cisplatin resulted in further reductions at  
408 concentrations in which cisplatin treatment alone had minor effects (**Figure 5C-E**). Notably, the  
409 combined treatment with tosedostat lowered the effective concentration to 2 $\mu$ M in patients 1 and  
410 2, and to 25 $\mu$ M in the highly treatment resistant patient 3 (**Figure 5C-E**). These findings are  
411 translationally relevant since the maximum concentration of cisplatin in patients is 14 $\mu$ M (Liston  
412 and Davis, 2017) and provide additional validation using a human-derived model system that  
413 tosedostat enhances cisplatin activity.  
414

415 The increase in NPEPPS mRNA that has been observed in response to chronic (**Figure 2B, C**)  
416 and acute cisplatin treatment *in vitro* and in the *ex vivo* organoids (**Figure 3E**) suggests that  
417 high levels of NPEPPS expression are part of an acquired or adaptive rather than intrinsic  
418 mechanism of drug resistance in tumors that have been exposed to cisplatin. Hence, pre-  
419 treatment tumor NPEPPS levels may not necessarily be a biomarker of chemotherapy response  
420 in bladder cancer. However, given the relationship of NPEPPS to VRACs described previously  
421 and findings that levels of LRRC8A and LRRC8D are predictive of cisplatin response in ovarian  
422 cancer (Planells-Cases et al., 2015a), we reasoned that such relationships would also be true in  
423 BCa. Using TCGA data from muscle invasive bladder cancer (Robertson et al., 2017), we  
424 compared patients with and without a record of platinum-based treatment (Goodspeed et al.,  
425 2019) with respect to amplification, copy number, and expression of either LRRC8A or  
426 LRRC8D. Notably, patients with LRRC8A and/or LRRC8D copy number gain or overexpression  
427 that received platinum-based treatment showed significantly improved overall survival in  
428 contrast to those with no record of this treatment modality (**Figure 5F, G**). Together, these  
429 findings support VRAC subunits LRRC8A and LRRC8D as pre-treatment biomarkers of  
430 response to cisplatin-based chemotherapy (Rottenberg et al., 2021).  
431  
432



## 433 DISCUSSION

434

435 NPEPPS has been suggested to play a role in a range of cellular processes including promoting  
436 autophagy, regulating cell cycle progression, and antigen processing (Constam et al., 1995;  
437 Menzies et al., 2010; Saric et al., 2004; Towne et al., 2008). The majority of what is known  
438 about NPEPPS has been from studies in the brain, where it targets the degradation of  
439 polyglutamine sequences and misfolded protein aggregates associated with a number of  
440 neurodegenerative diseases, including Alzheimer's disease, Huntington's Disease, and  
441 Parkinson's disease (Karsten et al., 2006; Kudo et al., 2011; Menzies et al., 2010; Schönlein et  
442 al., 1994; Yanagi et al., 2009). As reported in gnomAD, NPEPPS is a highly conserved gene  
443 and constrained based on several metrics of intolerance to genetic variation in the population  
444 (Karczewski et al., 2020). NPEPPS is also ubiquitously expressed across human tissues (Uhlen  
445 et al., 2017). However, despite these features, genetic modification in mice is tolerable (Osada  
446 et al., 1999; Towne et al., 2008) and as we have shown from our CRISPR screen results,  
447 knockout is not essential (**Figure 2D**). Overall, NPEPPS presents a viable therapeutic target  
448 and we have shown that its downregulation genetically or pharmacologically re-sensitizes  
449 treatment-resistant cells back to cisplatin.

450

451 Broadly, aminopeptidases have been therapeutically targeted as potential cancer treatments  
452 (Hitzert et al., 2014). More specifically, NPEPPS is a zinc containing M1 aminopeptidase.  
453 Tosedostat was developed as a target of M1 aminopeptidases and the intracellular metabolized  
454 product CHR-79888 is the most potent inhibitor of NPEPPS reported (Krige et al., 2008; Reid et  
455 al., 2009). There have been a total of 11 clinical trials with tosedostat as reported in  
456 *clinicaltrials.gov* (Cortes et al., 2013; van Herpen et al., 2010; Krige et al., 2008; Löwenberg et  
457 al., 2010; Mawad et al., 2016). The focus of its application has been in leukemias and  
458 myelomas, with several applications in solid tumors. The few clinical trials completed have  
459 reported tosedostat as being well tolerated by patients, but with modest effect as a cancer  
460 treatment alone. A few examples of tosedostat in combination with cytarabine, azacitidine,  
461 capecitabine or paclitaxel have been tried, but there are no reports of tosedostat being tried in  
462 combination with platinum-based chemotherapy, supporting the novel application of cisplatin-  
463 based chemotherapy plus tosedostat that we propose in this study.

464

465 Another exciting potential application of NPEPPS inhibition is to provide alternative treatment  
466 options for BCa patients. Many patients are ineligible for cisplatin-based chemotherapies,  
467 leaving them with less effective options, such as carboplatin. VRACs also transport carboplatin  
468 at similar amounts as cisplatin (Planells-Cases et al., 2015a), thus combining an NPEPPS  
469 inhibitor, such as tosedostat, with carboplatin could provide a more effective and less toxic drug  
470 combination option for cisplatin ineligible patients. A further area of novel development would be  
471 the impact of NPEPPS inhibition on ICT with its known effect on MHC class I antigen  
472 presentation on dendritic cells (Towne et al., 2008). ERAP1 and ERAP2, other M1  
473 aminopeptidases in the same family as NPEPPS, have been linked to boosting T cell and NK  
474 cell mediated immune response in cancer (Compagnone et al., 2019); however the impact of  
475 NPEPPS on antigen presentation in tumor cells is yet to be investigated. Interestingly, low  
476 ERAP2 was associated with improved response to anti-PD-L1 in luminal bladder cancer (Lim et  
477 al., 2018). The impact of NPEPPS inhibition in immunotherapies requires further study.

478

479 The data we provide supports the role of NPEPPS and VRACs in cisplatin-based response in  
480 BCa, thus we have scoped our conclusions to BCa. However, results outside of this study  
481 support a molecular mechanism with broader impact. The evidence that supports the interaction  
482 between NPEPPS and VRACs were derived from several different cell types and the evidence  
483 that implicates VRACs in platinum-based chemotherapy sensitivity is from ovarian cancer

484 (Planells-Cases et al., 2015b; Sørensen et al., 2014, 2016a, 2016b). If the NPEPPS-VRAC  
485 mechanism of platinum-based chemotherapy resistance is a general mechanism, then there are  
486 clear implications for any cancer type that uses platinum-based treatments. Hence, we can  
487 propose a hypothetical model (**Figure 6**) where a cancer cell imports cisplatin, which in turn  
488 causes DNA damage and eventually cell death. An inherent mechanism of resistance can  
489 simply be the number of VRACs in a tumor cell, where downregulation of VRAC subunits can  
490 lead to treatment resistance, such as was previously found in ovarian cancer, or the opposite  
491 effect seen with LRRc8A or LRRc8D upregulation in BCa (**Figure 5F, G**). In our model,  
492 NPEPPS interacts with LRRc8A and/or LRRc8D to inhibit channel activity, thus providing  
493 resistance to cisplatin and overall chemoresistance. If proven to be true, our insight into this  
494 mechanism opens up opportunities for novel therapeutic strategies to reverse or prevent the  
495 development of cisplatin resistance, such as the development of agents that block NPEPPS  
496 interactions with VRACs.

497  
498 This work is not without its limitations. There is strong evidence from independent studies with  
499 multiple different cell lines and experimental techniques that NPEPPS and VRAC subunit  
500 proteins interact (Huttlin et al., 2020; Kasuya et al., 2018; Syeda et al., 2016). It would be very  
501 surprising this would not be the case for BCa. We have also shown in multiple settings that  
502 inhibiting NPEPPS genetically or pharmacologically results in re-sensitizing resistant BCa cells  
503 to cisplatin. However, where and when NPEPPS interacts with VRACs in the cell is yet to be  
504 determined. In addition, NPEPPS could have effects on treatment response outside of the  
505 VRACs. Our work is also limited by the fact that we have not shown that NPEPPS depletion  
506 leads directly to carboplatin sensitization in BCa, but that is likely given the known VRAC  
507 relationships (Planells-Cases et al., 2015a). Despite these study limitations, the implications of  
508 NPEPPS as a therapeutic target for better treatment response has the potential to be translated  
509 into novel treatment regimens for improved patient outcomes.

510  
511 In conclusion, our finding that NPEPPS mediates cisplatin-based chemoresistance is both novel  
512 and actionable. We provided *in vitro*, *in vivo*, and *ex vivo* evidence that this mechanism is robust  
513 and therapeutically targetable. Future directions will include determining the detailed  
514 mechanism of NPEPPS-mediated treatment response, particularly though the interaction with  
515 VRACs, and generating additional pre-clinical data testing NPEPPS inhibitor efficacy and  
516 toxicities. Cisplatin-based chemotherapeutic regimens are mainstays of treatment across many  
517 cancer types and these novel findings lay the groundwork for improved treatment of patients  
518 harboring these tumors (Rottenberg et al., 2021). Our findings also have implications into other  
519 platinum agents, such as carboplatin which would further improve efficacy of this agent in  
520 additional cancer types. Finally, for the benefit of the research community, we make the -omic  
521 and CRISPR screen data publicly available through an R Shiny app  
522 ([https://bioinformatics.cuanschutz.edu/GC\\_Visualization/](https://bioinformatics.cuanschutz.edu/GC_Visualization/)) which will provide a rich source for  
523 novel analysis in the mechanisms of chemotherapy resistance.

524  
525

526 **Materials and Methods**

527

528 **Key Resource Table**

| REAGENT or RESOURCE                                                 | SOURCE                      | IDENTIFIER   |
|---------------------------------------------------------------------|-----------------------------|--------------|
| <b>Antibodies</b>                                                   |                             |              |
| NPEPPS                                                              | Invitrogen                  | PA5-22383    |
| NPEPPS                                                              | Invitrogen                  | PA5-83788    |
| GAPDH (D16H11) XP Rabbit mAb                                        | Cell Signaling Technologies | 5174S        |
| Anti-LRRC8A, Rabbit polyclonal                                      | LSBio                       | LS-B16989    |
| Anti-LRRC8D, Rabbit polyclonal                                      | SinoBiological              | 104245-T32   |
| Phospho-Histone H2A.X (Ser139) Monoclonal Antibody (3F2)            | Invitrogen                  | MA1-2022     |
| Anti-mouse IgG (whole molecule), peroxidase antibody in rabbit      | Sigma-Aldrich               | A9044        |
| Anti-rabbit IgG (whole molecule), peroxidase-conjugated (HRP)       | MP Biomedicals              | 855689       |
| <b>Bacterial and Virus Strains</b>                                  |                             |              |
| Library Efficiency™ DH5α competent cells                            | ThermoFisher                | 18263012     |
| Endura™ ElectroCompetent cells                                      | Lucigen                     | 60242        |
| <b>Chemicals, Peptides, and Recombinant Proteins</b>                |                             |              |
| Gemcitabine hydrochloride                                           | Sigma                       | Y0000675     |
| Gemcitabine hydrochloride (mouse experiment)                        | BOC Sciences                | 122111-03-9  |
| Cisplatin                                                           | Sigma                       | PHR-1624     |
| Cisplatin (mouse experiment)                                        | Sigma                       | 11344357     |
| Tosedostat                                                          | Sigma                       | SML2303      |
| Tosedostat (mouse experiment)                                       | BOC Sciences                | BCMV18265-2B |
| Tosedostat (organoids)                                              | Tocris                      | 3595         |
| Puromycin dihydrochloride                                           | Sigma                       | P9620        |
| Fetal Bovine Serum (FBS)                                            | VWR Seradigm Life Sciences  | 89510-186    |
| RIPA Lysis and Extraction Buffer                                    | ThermoFisher                | 89900        |
| T-PER™ Tissue Protein Extraction Reagent                            | ThermoFisher                | PI78510      |
| Halt™ Protease and Phosphatase Inhibitor Cocktail, EDTA-free (100X) | ThermoFisher                | PI78443      |
| Polybrene [10mg/mL]                                                 | EMD Millipore               | TR-1003-G    |
| Lipofectamine 3000 Reagent                                          | ThermoFisher                | L3000075     |
| Polyethylenimine, linear (PEI)                                      | Polysciences, Inc.          | 23966        |
| Lipofectamine® RNAiMAX Reagent                                      | ThermoFisher                | 13778075     |
| 0.5% Trypsin-EDTA (10x)                                             | Gibco                       | 15400-54     |
| DPBS (1x)                                                           | Gibco                       | 14190-144    |
| 4% formalin                                                         | Sigma                       | HT501128     |
| 2.5% Low-Melting Agarose                                            | Sigma                       | 2070         |
| Herculase II Fusion Enzyme                                          | Agilent                     | 600679       |
| DNAseI                                                              | Invitrogen                  | 18068015     |
| Deoxynucleotide (dNTP) Solution Mix                                 | New England Biolabs         | N0447L       |
| <b>Critical Commercial Assays</b>                                   |                             |              |
| Puregene Cell and tissue Kit                                        | Qiagen                      | 158388       |
| RNase A Solution                                                    | Qiagen                      | 158924       |

|                                                                    |                                                                                                                                                                                                                                                                                 |                                                                                                                                                           |
|--------------------------------------------------------------------|---------------------------------------------------------------------------------------------------------------------------------------------------------------------------------------------------------------------------------------------------------------------------------|-----------------------------------------------------------------------------------------------------------------------------------------------------------|
| SureSelect Human All Exon v6                                       | Agilent                                                                                                                                                                                                                                                                         | G9611                                                                                                                                                     |
| Amersham ECL Rainbow Marker -Full Range                            | Sigma                                                                                                                                                                                                                                                                           | RPN8000E                                                                                                                                                  |
| Precision Plus Protein™ Kaleidoscope™ Prestained Protein Standards | Biorad                                                                                                                                                                                                                                                                          | 1610375                                                                                                                                                   |
| SuperSignal West Pico Plus                                         | ThermoFisher                                                                                                                                                                                                                                                                    | 34580                                                                                                                                                     |
| SuperSignal West Fempto                                            | ThermoFisher                                                                                                                                                                                                                                                                    | 34094                                                                                                                                                     |
| 4–20% Mini-PROTEAN® TGX™ Precast Protein Gels                      | Biorad                                                                                                                                                                                                                                                                          | 4561096,<br>4561094                                                                                                                                       |
| 4X Protein Sample Loading Buffer for Western Blots                 | LI-COR                                                                                                                                                                                                                                                                          | 928-40004                                                                                                                                                 |
| KAPA library Quant Kit ROX Low                                     | Kapa Biosystems                                                                                                                                                                                                                                                                 | KK4873                                                                                                                                                    |
| Pierce™ BC Protein Assay Kit                                       | ThermoFisher                                                                                                                                                                                                                                                                    | 23225                                                                                                                                                     |
| Universal Plus mRNA –Seq +UDI kit                                  | Nugen Technologies                                                                                                                                                                                                                                                              | 9144-96                                                                                                                                                   |
| RNAEasy Plus                                                       | Qiagen                                                                                                                                                                                                                                                                          | 74106                                                                                                                                                     |
| QIAmp DNA Mini-Kit                                                 | Qiagen                                                                                                                                                                                                                                                                          | 51304                                                                                                                                                     |
| Cell-ID 20-plex Pd Barcoding Kit                                   | Fluidigm                                                                                                                                                                                                                                                                        | 201060                                                                                                                                                    |
| MycoAlert                                                          | Lonza                                                                                                                                                                                                                                                                           | LT07-318                                                                                                                                                  |
| SensiFAST Probe No-ROX Mix                                         | Bioline                                                                                                                                                                                                                                                                         | BIO-86005                                                                                                                                                 |
| SuperScript™ II Reverse Transcriptase                              | Invitrogen                                                                                                                                                                                                                                                                      | 18064022                                                                                                                                                  |
| NPEPPS TaqMan® Gene Expression Assay                               | Thermofisher                                                                                                                                                                                                                                                                    | Hs00196905_m1                                                                                                                                             |
| HMBS TaqMan® Gene Expression Assay                                 | Thermofisher                                                                                                                                                                                                                                                                    | Hs00609297_m1                                                                                                                                             |
| alamarBlue™ Cell Viability Reagent                                 | Invitrogen                                                                                                                                                                                                                                                                      | DAL 1025                                                                                                                                                  |
| Biorad Protein Assay Dye reagent concentrate                       | Biorad                                                                                                                                                                                                                                                                          | 5000006                                                                                                                                                   |
| <b>Deposited Data</b>                                              |                                                                                                                                                                                                                                                                                 |                                                                                                                                                           |
| Raw RNA sequencing data                                            | This paper                                                                                                                                                                                                                                                                      | GEO:XX                                                                                                                                                    |
| Raw whole exome sequencing                                         | This paper                                                                                                                                                                                                                                                                      | GEO:XX                                                                                                                                                    |
| Affymetrix GSA V3 organoid CAN                                     | This paper                                                                                                                                                                                                                                                                      | GEO:XX                                                                                                                                                    |
| Raw mass spectrometry proteomics                                   | This paper                                                                                                                                                                                                                                                                      | Peptide Atlas:XX                                                                                                                                          |
| CRISPR screening results                                           | This paper                                                                                                                                                                                                                                                                      | <b>Table S13</b>                                                                                                                                          |
| Bladder tumor proteomics                                           | ProteomeXchange                                                                                                                                                                                                                                                                 | PXD010260                                                                                                                                                 |
| TCGA bladder cancer patient gene expression                        | cBioPortal                                                                                                                                                                                                                                                                      | <a href="https://cbioportal-datahub.s3.amazonaws.com/blca_tcga_pub_2017.tar.gz">https://cbioportal-datahub.s3.amazonaws.com/blca_tcga_pub_2017.tar.gz</a> |
| TCGA bladder cancer survival data                                  | (Goodspeed et al., 2019)                                                                                                                                                                                                                                                        | Supplementary Table 4                                                                                                                                     |
| DepMap Common essential and non-essential genes (20Q1)             | <a href="https://depmap.org/portal/download">https://depmap.org/portal/download</a>                                                                                                                                                                                             | common_essentials.csv,<br>nonessentials.csv                                                                                                               |
| <b>Experimental Models: Cell Lines</b>                             |                                                                                                                                                                                                                                                                                 |                                                                                                                                                           |
| T24 parental                                                       | Resistant Cancer Cell Line Collection ( <a href="https://research.kent.ac.uk/industrial-biotechnology-centre/the-resistant-cancer-cell-line-rccl-collection/">https://research.kent.ac.uk/industrial-biotechnology-centre/the-resistant-cancer-cell-line-rccl-collection/</a> ) | N/A                                                                                                                                                       |
| T24 gemcitabine resistant                                          |                                                                                                                                                                                                                                                                                 | N/A                                                                                                                                                       |
| T24 cisplatin resistant                                            |                                                                                                                                                                                                                                                                                 | N/A                                                                                                                                                       |
| T24 gemcitabine and cisplatin resistant                            |                                                                                                                                                                                                                                                                                 | N/A                                                                                                                                                       |
| TCCSUP parental                                                    |                                                                                                                                                                                                                                                                                 | N/A                                                                                                                                                       |
| TCCSUP gemcitabine resistant                                       |                                                                                                                                                                                                                                                                                 | N/A                                                                                                                                                       |
| TCCSUP cisplatin resistant                                         |                                                                                                                                                                                                                                                                                 | N/A                                                                                                                                                       |
| TCCSUP gemcitabine and cisplatin resistant                         |                                                                                                                                                                                                                                                                                 | N/A                                                                                                                                                       |
| 253J parental                                                      |                                                                                                                                                                                                                                                                                 | N/A                                                                                                                                                       |
| 253J gemcitabine resistant                                         |                                                                                                                                                                                                                                                                                 | N/A                                                                                                                                                       |

|                                                                                   |                                                     |                                                                                                                                                                                                                           |
|-----------------------------------------------------------------------------------|-----------------------------------------------------|---------------------------------------------------------------------------------------------------------------------------------------------------------------------------------------------------------------------------|
| 253J cisplatin resistant                                                          |                                                     | N/A                                                                                                                                                                                                                       |
| 253J gemcitabine and cisplatin resistant                                          |                                                     | N/A                                                                                                                                                                                                                       |
| KU1919 parental                                                                   |                                                     | N/A                                                                                                                                                                                                                       |
| KU1919 gemcitabine resistant                                                      |                                                     | N/A                                                                                                                                                                                                                       |
| KU1919 cisplatin resistant                                                        |                                                     | N/A                                                                                                                                                                                                                       |
| KU1919 gemcitabine and cisplatin resistant                                        |                                                     | N/A                                                                                                                                                                                                                       |
| 5637 parental                                                                     |                                                     | N/A                                                                                                                                                                                                                       |
| 5637 gemcitabine resistant                                                        |                                                     | N/A                                                                                                                                                                                                                       |
| 5637 cisplatin resistant                                                          |                                                     | N/A                                                                                                                                                                                                                       |
| 5637 gemcitabine and cisplatin resistant                                          |                                                     | N/A                                                                                                                                                                                                                       |
| 293FT                                                                             | ThermoFisher                                        | R70007                                                                                                                                                                                                                    |
| <b>Experimental Models: Organisms/Strains</b>                                     |                                                     |                                                                                                                                                                                                                           |
| Mouse: Nu/J (JAX)                                                                 | The Jackson Laboratory                              | 002019                                                                                                                                                                                                                    |
| <b>Oligonucleotides</b>                                                           |                                                     |                                                                                                                                                                                                                           |
| CRISPR screening library primers                                                  | <b>Table S11</b>                                    | N/A                                                                                                                                                                                                                       |
| <b>Recombinant DNA</b>                                                            |                                                     |                                                                                                                                                                                                                           |
| Human CRISPR Knockout Pooled Library (Brunello) - 1 vector system (lentiCRISPRv2) | Addgene                                             | 73179                                                                                                                                                                                                                     |
| psPAX2                                                                            | Addgene                                             | 12260                                                                                                                                                                                                                     |
| pMD2.G                                                                            | Addgene                                             | 12259                                                                                                                                                                                                                     |
| shCtrl1                                                                           | University of Colorado Functional Genomics Facility | SHC002                                                                                                                                                                                                                    |
| shCtrl2                                                                           | University of Colorado Functional Genomics Facility | SHC016                                                                                                                                                                                                                    |
| shN38                                                                             | University of Colorado Functional Genomics Facility | TRCN0000073838                                                                                                                                                                                                            |
| shN39                                                                             | University of Colorado Functional Genomics Facility | TRCN0000073839                                                                                                                                                                                                            |
| shN40                                                                             | University of Colorado Functional Genomics Facility | TRCN0000073840                                                                                                                                                                                                            |
| <b>Software and Algorithms</b>                                                    |                                                     |                                                                                                                                                                                                                           |
| BWA-MEM (0.7.17)                                                                  | (Li, 2013)                                          | <a href="http://bio-bwa.sourceforge.net">http://bio-bwa.sourceforge.net</a>                                                                                                                                               |
| Samblaster (0.1.24)                                                               | (Faust and Hall, 2014)                              | <a href="https://github.com/GregoryFaust/samblaster">https://github.com/GregoryFaust/samblaster</a>                                                                                                                       |
| Samtools (1.8)/HTSlib (1.9)                                                       | (Li et al., 2009)                                   | <a href="http://www.htslib.org/">http://www.htslib.org/</a>                                                                                                                                                               |
| GATK Base Quality Score Recalibration (BQSR)                                      | GATK4 v4.1.8                                        | <a href="https://gatk.broadinstitute.org/hc/en-us/articles/360035890531-Base-Quality-Score-Recalibration-BQSR-">https://gatk.broadinstitute.org/hc/en-us/articles/360035890531-Base-Quality-Score-Recalibration-BQSR-</a> |
| Calling Somatic SNVs and Indels with Mutect2                                      | (Benjamin et al., 2019)                             | <a href="https://www.biorxiv.org/content/10.1101/861054v1.full.pdf">https://www.biorxiv.org/content/10.1101/861054v1.full.pdf</a>                                                                                         |

|                                                                           |                                                                                                             |                                                                                                                                                                                                                                   |
|---------------------------------------------------------------------------|-------------------------------------------------------------------------------------------------------------|-----------------------------------------------------------------------------------------------------------------------------------------------------------------------------------------------------------------------------------|
| Somatic copy number variants                                              | GATK4 v4.1.8                                                                                                | <a href="http://genomics.broadinstitute.org/data-sheets/PPT_Somatic_CNV_WKST_ASH_G_2016.pdf">http://genomics.broadinstitute.org/data-sheets/PPT_Somatic_CNV_WKST_ASH_G_2016.pdf</a>                                               |
| The Nextflow (20.04.1) pipeline implementing the workflows for this paper | This paper                                                                                                  | <a href="https://github.com/javidm/layer_lab_vc">https://github.com/javidm/layer_lab_vc</a>                                                                                                                                       |
| SavvyCNV: genome-wide CNV calling from off-target reads v0.10             | (Laver et al., 2019)                                                                                        | <a href="https://www.biorxiv.org/content/10.1101/617605v1">https://www.biorxiv.org/content/10.1101/617605v1</a>                                                                                                                   |
| BBTools                                                                   | BBMap – Bushnell B. – <a href="https://sourceforge.net/projects/bbmap/">sourceforge.net/projects/bbmap/</a> | <a href="https://jgi.doe.gov/data-and-tools/bbtools/">https://jgi.doe.gov/data-and-tools/bbtools/</a>                                                                                                                             |
| Image Studio                                                              | LiCor                                                                                                       | <a href="https://www.licor.com/bio/image-studio/">https://www.licor.com/bio/image-studio/</a>                                                                                                                                     |
| STAR (2.6.0a)                                                             | (Dobin et al., 2013)                                                                                        | <a href="https://github.com/alexdobin/STAR">https://github.com/alexdobin/STAR</a>                                                                                                                                                 |
| FLowJo (10.7.1)                                                           | (FlowJo, 2019)                                                                                              | <a href="https://www.flowjo.com/">https://www.flowjo.com/</a>                                                                                                                                                                     |
| Biodiscovery Nexus CN7.5                                                  | N/A                                                                                                         | <a href="https://www.biodiscovery.com/products/Nexus-Copy-Number">https://www.biodiscovery.com/products/Nexus-Copy-Number</a>                                                                                                     |
| GenomeStudio (1.9.4)                                                      | Genotyping Module                                                                                           | <a href="https://www.illumina.com/techniques/microarrays/array-data-analysis-experimental-design/genomestudio.html">https://www.illumina.com/techniques/microarrays/array-data-analysis-experimental-design/genomestudio.html</a> |
| Limma R package (3.44.3)                                                  | (Ritchie et al., 2015)                                                                                      | <a href="https://bioconductor.org/packages/release/bioc/html/limma.html">https://bioconductor.org/packages/release/bioc/html/limma.html</a>                                                                                       |
| edgeR R package (3.30.3)                                                  | (Robinson et al., 2010)                                                                                     | <a href="https://bioconductor.org/packages/release/bioc/html/edgeR.html">https://bioconductor.org/packages/release/bioc/html/edgeR.html</a>                                                                                       |
| fgsea R package (1.14.0)                                                  | (Sergushichev, 2016)                                                                                        | <a href="https://bioconductor.org/packages/release/bioc/html/fgsea.html">https://bioconductor.org/packages/release/bioc/html/fgsea.html</a>                                                                                       |
| ggplot2 R package (3.2.2)                                                 | (Wickham, 2009)                                                                                             | <a href="https://ggplot2.tidyverse.org/">https://ggplot2.tidyverse.org/</a>                                                                                                                                                       |
| ggpubr R package (0.4.0)                                                  | N/A                                                                                                         | <a href="https://cran.r-project.org/web/packages/ggpubr/index.html">https://cran.r-project.org/web/packages/ggpubr/index.html</a>                                                                                                 |
| ClusterProfiler                                                           | (Yu et al., 2012)                                                                                           | <a href="https://bioconductor.org/packages/release/bioc/html/clusterProfiler.html">https://bioconductor.org/packages/release/bioc/html/clusterProfiler.html</a>                                                                   |



|                     |                           |                                                                                                                                                         |
|---------------------|---------------------------|---------------------------------------------------------------------------------------------------------------------------------------------------------|
| caRpoools R package | (Winter et al., 2016)     | <a href="https://cran.r-project.org/web/packages/caRpoools/index.html">https://cran.r-project.org/web/packages/caRpoools/index.html</a>                 |
| DEseq2 R package    | (Love et al., 2014)       | <a href="https://bioconductor.org/packages/release/bioc/html/DESeq2.html">https://bioconductor.org/packages/release/bioc/html/DESeq2.html</a>           |
| Maven               | (Clasquin et al., 2012)   | <a href="http://genomics-pubs.princeton.edu/mzroll/index.php">http://genomics-pubs.princeton.edu/mzroll/index.php</a>                                   |
| openSWATH           | (Röst et al., 2014)       | <a href="http://openswath.org/en/latest/">http://openswath.org/en/latest/</a>                                                                           |
| vsn (3.12)          | (Huber et al., 2002)      | <a href="https://bioconductor.org/packages/release/bioc/html/vsn.html">https://bioconductor.org/packages/release/bioc/html/vsn.html</a>                 |
| lme4 (1.1-26)       | (Bates et al., 2015)      | <a href="https://cran.r-project.org/web/packages/lme4/index.html">https://cran.r-project.org/web/packages/lme4/index.html</a>                           |
| lmerTest (3.1-3)    | (Kuznetsova et al., 2017) | <a href="https://cran.r-project.org/web/packages/lmerTest/index.html">https://cran.r-project.org/web/packages/lmerTest/index.html</a>                   |
| PyProphet           | (Teleman et al., 2015)    | <a href="http://openswath.org/en/latest/docs/pyprophet.html">http://openswath.org/en/latest/docs/pyprophet.html</a>                                     |
| MSstats R package   | (Choi et al., 2014)       | <a href="https://www.bioconductor.org/packages/release/bioc/html/MSstats.html">https://www.bioconductor.org/packages/release/bioc/html/MSstats.html</a> |
| TRIC                | (Röst et al., 2016)       | <a href="https://github.com/msproteomicstools/msproteomicstools">https://github.com/msproteomicstools/msproteomicstools</a>                             |

529

530

## Cell Culture

531 All human BCa cell lines as reported in the Key Resource Table were obtained from the  
 532 Resistant Cancer Cell Line (RCCL) Collection and were grown in Iscove's Modified Dulbecco's  
 533 Medium (IMDM) with 10% Fetal Bovine Serum (FBS). Cells were passaged every two to three  
 534 days. Resistance to gemcitabine and cisplatin were confirmed at the reported resistance doses  
 535 from the RCCL (**Table S1** and **Figure S1**). Lentivirus production utilized 293FT cells  
 536 (ThermoFisher), which were maintained in DMEM (high glucose) supplemented with 0.1mM  
 537 non-essential amino acids (NEAA), 6mM L-glutamine, 1mM sodium pyruvate, and 500µg/mL  
 538 geneticin (G418) with 10% FBS added. Cells were routinely monitored for mycoplasma and  
 539 confirmed negative at multiple times during this study using MycoAlert (Lonza). All cells were  
 540 grown at 37°C with 5% CO<sub>2</sub> in a humidified incubator.

541 All molecular characterization efforts (RNA sequencing, whole exome sequencing, and mass  
 542 spectrometric proteomics) were performed on cells from independent passages and in drug-  
 543 free, complete media to identify stable molecular changes rather than treatment induced  
 544 transient adaptations. Cells were routinely passaged through drug-containing media at the



545 resistant doses (**Table S1**) to confirm resistance was maintained and early passage cells were  
546 utilized whenever possible.

547

## 548 **RNA sequencing**

### 549 ***Sample preparation***

550 All cell lines were grown for several passages in the absence of antibiotics, gemcitabine or  
551 cisplatin. Cell pellets were snap frozen from sub-confluent dishes from 3 separate passages  
552 (replicates) for each of the 20 cell lines sequenced (5 cell lines, each with 4 derivatives:  
553 parental, G-resistant, C-resistant, GC-resistant). RNA was extracted using the RNAeasy Plus  
554 Kit (Qiagen). Cells were lysed and passed through QIAshredder column (Qiagen) according to  
555 the manufacturer's protocol. gDNA elimination columns (Qiagen) were used to remove any  
556 residual gDNA from the purified RNA. RNA integrity was assessed on the High Sensitivity  
557 ScreenTape Assay on the Tape Station2200 (Agilent Technologies) and only samples with an  
558 RIN score of 8 or higher were used for sequencing. RNA library preparation was performed  
559 using the Universal Plus mRNA –Seq +UDI kit (Nugen Technologies) according to the  
560 manufacturer's specification. Each library was sequenced to a minimum of 40 million clusters or  
561 80 million 150bp paired-end reads on a NovaSeq 6000 instrument (Illumina) at the University of  
562 Colorado Cancer Center Genomics Shared Resource.

### 563 ***Data processing***

564 Illumina adapters and the first 12 base pairs of each read were trimmed using BBDuk and reads  
565 <50bp post trimming were discarded. Reads were aligned and quantified using STAR (Dobin et  
566 al., 2013) against the Ensembl human transcriptome (GRCh38.p12 genome (release 96)).  
567 Ensembl genes were mapped to HGNC gene symbols using HGNC and Ensembl BioMart.  
568 Gene counts were generated using the sum of counts for transcripts of the same gene. Lowly  
569 expressing genes were removed if mean raw count <1 or mean CPM (counts per million) <1 for  
570 the entire dataset. Reads were normalized to CPM using the edgeR R package (Robinson et  
571 al., 2010). Differential expression was calculated using the voom function in the limma R  
572 package (Ritchie et al., 2015). In addition to two-group comparisons, single drug comparisons  
573 for all cell lines were generated with cell line as a covariate (**Table S7**).

### 574 ***Alignment and transcript quantification***

575 STAR --runThreadN 12 --runMode genomeGenerate --sjdbGTFfile

576 Homo\_sapiens.GRCh38.96.gtf --genomeFastaFiles

577 Homo\_sapiens.GRCh38.dna\_sm.primary\_assembly.fa

578

579 STAR --readFilesIn Read1.fastq.gz Read2.fastq.gz --readFilesCommand zcat --runThreadN 6 --

580 alignEndsProtrude 13 ConcordantPair --outFilterScoreMinOverLread 0.66 --

581 outFilterMatchNminOverLread 0.66 --outSAMtype BAM SortedByCoordinate --quantMode

582 GeneCounts

583

### 584 ***Pathway analysis***

585 Gene set enrichment analysis was performed using the full list of genes ranked by fold change  
586 for the indicated comparison and the fgsea R package (Sergushichev, 2016) using gene sets  
587 from the Molecular Signatures Database (v7.0) (Liberzon et al., 2011). Over representation  
588 analysis was performed using the ClusterProfiler R package with genes less than an adjusted p-  
589 value 0.05 (Yu et al., 2012) or Metascape (Zhou et al., 2019). General plots were generated

590 with the ggplot2 and ggpubr R packages (Wickham, 2009). Heatmaps were generated with the  
591 ComplexHeatmap R package following z-score transformation (Gu et al., 2016).

592

## 593 **Proteomics**

### 594 ***Sample preparation***

595 All cell lines were grown for several passages in the absence of antibiotics, gemcitabine or  
596 cisplatin, then seeded at 100,000 – 200,000 cells per well and grown for 48 hours in IMDM +  
597 10% FBS. Approximately 48 hours after seeding cells the supernatant was aspirated and cells  
598 were washed 3 times with cold phosphate buffered saline (PBS). Cells were lysed in 100 $\mu$ L of  
599 8M Urea, 50mM Tris-HCl, pH 8.0. Lysates were transferred to pre-chilled 1.5mL microcentrifuge  
600 tubes and centrifuged at 15000 RCF for 10 minutes to pellet. The supernatant was then  
601 transferred to a clean, pre-chilled tube and frozen. Lysate replicates were collected in triplicate  
602 from different passages. Cell pellets were lysed in 8M Urea supplemented with 0.1% Rapigest  
603 MS compatible detergent. DNA was sheared using probe sonication, and protein concentration  
604 was estimated by BCA (Pierce, Thermo Scientific). A total of 30 $\mu$ g protein per sample was  
605 aliquoted, and samples were diluted to <2M Urea concentration using 200mM ammonium  
606 bicarbonate while also undergoing reduction with DTT (10mM) and then alkylation with IAA  
607 (100mM). The pH of diluted protein lysates was verified as between 7-8, and samples were  
608 digested with sequencing grade Trypsin/Lys-C enzyme (Promega) in the presence of 10%  
609 Acetonitrile for 16 hours at 37°C. Samples were acidified adding formic acid to 1%, and speed  
610 vac dehydration was used to evaporate acetonitrile. Peptides were desalted on C18 tips (Nest  
611 group) and dried to completion. Prior to MS, peptides were resuspended in 0.1% Formic Acid  
612 solution at 0.5 $\mu$ g/ $\mu$ L concentration with 1:40 synthetic iRT reference peptides (Biognosys).

### 613 ***Data acquisition***

614 Peptides were analyzed by liquid chromatography coupled with mass spectrometry in data  
615 independent acquisition (DIA) mode essentially as described previously (Robinson et al., 2020).  
616 Briefly, 4 $\mu$ L of digested sample were injected directly unto a 200 cm micro pillar array column  
617 (uPAC, Pharmafluidics) and separated over 120 minutes reversed phase gradient at 1200  
618 nL/min and 60°C. The gradient of aqueous 0.1% formic acid (A) and 0.1% formic acid in  
619 acetonitrile (B) was implemented as follows: 2% B from 0 to 5 min, ramp to 4% B at 5.2 minutes,  
620 linear ramp to 28% B at 95 minutes, and ramp to 46% B at 120 minutes. After each analytical  
621 run, the column was flushed at 1200 nL/min and 60°C by injection of 50% Methanol at 95% B  
622 for 25 minutes followed by a 10 minutes ramp down to 2% B and a 5 minute equilibration to 2%  
623 B. The eluting peptides were electro sprayed through a 30  $\mu$ m bore stainless steel emitter  
624 (EvoSep) and analyzed on an Orbitrap Lumos using data independent acquisition (DIA)  
625 spanning the 400-1000 m/z range. Each DIA scan isolated a 4 m/z window with no overlap  
626 between windows, accumulated the ion current for a maximum of 54 seconds to a maximum  
627 AGC of 5E5, activated the selected ions by HCD set at 30% normalized collision energy, and  
628 analyzed the fragments in the 200-2000m/z range using 30,000 resolution (m/z = 200). After  
629 analysis of the full m/z range (150 DIA scans) a precursor scan was acquired over the 400-1000  
630 m/z range at 60,000 resolution.

### 631 ***Peptide library generation***

632 To construct a comprehensive peptide ion library for the analysis of human BCa we combined  
633 several datasets, both internally generated and external publicly available data resources were  
634 utilized. First, we utilized a previously published (Berle et al., 2018) human bladder tumor  
635 proteomics experiment by downloading raw files from the online data repository

636 (ProteomeXchange, PXD010260) and searching them through our internal pipeline for data  
637 dependent acquisition MS analysis (Parker et al., 2016) against the uniprot human reviewed  
638 canonical sequence database, downloaded July 2019, using internal peptides to perform  
639 retention time alignment (Parker et al., 2015). To this library, we appended a sample specific  
640 library generated from DIA-Umpire extraction of pseudo-spectra from one full set of replicates  
641 from the experimental bladder tumor cell lines. A final, combined consensus spectrast library  
642 containing all peptide identifications made between the internal and external dataset was  
643 compiled and decoy sequences were appended.

#### 644 **Data analysis**

645 Peptide identification was performed as previously described in (Parker et al., 2015, 2016).  
646 Briefly, we extracted chromatograms and assigned peak groups using openSWATH (Röst et al.,  
647 2014) against the custom BCa peptide assay library described above. False discovery rate for  
648 peptide identification was assigned using PyProphet (Teleman et al., 2015) and the TRIC (Röst  
649 et al., 2016) algorithm was used to perform feature-alignment across multiple runs of different  
650 samples to maximize data completeness and reduce peak identification errors. Target peptides  
651 with a false discovery rate (FDR) of identification <1% in at least one dataset file, and up to 5%  
652 across all dataset files were included in the final results. We used SWATH2stats to convert our  
653 data into the correct format for use with downstream software MSstats27. Each individual data  
654 file was intensity normalized by dividing the raw fragment intensities to that files total MS2  
655 signal. MSstats (Choi et al., 2014) was used to convert fragment-level data into protein-level  
656 intensity estimates via the 'quantData' function, utilizing default parameters with the exception of  
657 data normalization, which was set to 'FALSE'. For plotting purposes, protein intensities were  
658 VSN normalized, log-transformed, and replicate batch effects were removed using the  
659 removeBatchEffect function in the limma R package. The limma package was also used to  
660 calculate differential protein expression. Multiple hypothesis correction was performed using the  
661 Benjamin Hochberg method.

662

#### 663 **Whole exome sequencing**

##### 664 **Sample preparation**

665 All cell lines were grown for several passages in the absence of antibiotics, gemcitabine or  
666 cisplatin. Cell pellets were snap frozen from sub-confluent dishes for each of the 20 cell lines  
667 sequenced (5 cell lines, each with 4 derivatives: parental, Gem-resistant, Cis-resistant, GemCis-  
668 resistant). gDNA isolation was performed using the Puregene cell and tissue kit (Qiagen) with  
669 the addition of RNase A Solution (Qiagen) according to manufacturer's instructions. gDNA was  
670 quantified using a Qubit 4.0, then sheared using a Covaris S220 Sonicator to 200bp. Libraries  
671 were constructed using the Sure Select All Exon v6 library kit (Agilent) following the XT library  
672 preparation workflow. Completed libraries were run on the 4200 Tape Station (Agilent) using  
673 D1000 screen tape. Libraries were quantitated using the Qubit, diluted to 4nM prior to  
674 verification of cluster efficiency using qPCR, then sequenced on the NovaSeq 6000 instrument  
675 (Illumina) (150bp, paired-end) at the University of Colorado Cancer Center Genomics Shared  
676 Resource. Mean insert size across all cell lines was 177.8 bp and mean coverage was 193.7X  
677 with > 96.8% at >30X. Individual call line quality control metrics are reported in **Table S12**.

##### 678 **Data processing**

679 The analysis pipeline was developed using Nextflow. For the raw fastq files, Fastqc was used to  
680 assess overall quality. For computational efficiency, raw sequence reads were partitioned using  
681 BBMap (partition.sh) into 40 partitions. They then were aligned to the GRCh38 reference  
682 genome (including decoy sequences from the GATK resource bundle) using the BWA-MEM

683 short read aligner (Li, 2013), and merged back into single BAM files using Samtools. The  
684 resulting BAM files were de-duplicated using Samblaster (Faust and Hall, 2014), and sorted  
685 using Samtools. These duplicate-marked bams were further passed through the GATK Base  
686 Quality Score Recalibration in order to detect systematic errors made by the sequencing  
687 machine when it estimates the accuracy of base calls. The dbSNP (version 146) (Sherry et al.,  
688 2001), the 1000 Genome Project Phase 1 (1000 Genomes Project Consortium et al., 2015), and  
689 the Mills and 1000G gold standard sets (Mills et al., 2011) were used as databases of known  
690 polymorphic sites to exclude regions around known polymorphisms from analysis. After  
691 alignment, Samtools (Li et al., 2009), Qualimap (Okonechnikov et al., 2016), and Picard tools  
692 (2018) were run to acquire various metrics to ensure there were no major anomalies in the  
693 aligned data.

#### 694 **Alignment**

695 `bwa mem -K 100000000 -R "read_group" -t 64 -M ref_fasta read_1 read_2`

#### 696 **Marking duplicates**

697 `samtools sort -n -O SAM sample_bam | samblaster -M --ignoreUnmated`

#### 698 **Base Quality Score Recalibration**

699 `gatk BaseRecalibrator -I sample_bam -O sample.recal.table -R ref_fasta --known-sites`  
700 `known_sites`

#### 701 **Whole exome sequencing variant calling**

702 We used Mutect2 from the GATK toolkit for SNVs and short indels (Benjamin et al., 2019).  
703 Mutect2 is designed to call somatic variants and makes no assumptions about the ploidy of  
704 samples. It was run in *tumor-only* mode to maximize the sensitivity albeit at the risk of high false  
705 positives. We used tumor-only mode to call variants for each cell line separately. Mutect2  
706 workflow is a two steps process. In the first step, it operates in high sensitivity mode to generate  
707 intermediate callsets that are further subjected to filtering to generate the final variant calls.  
708 Annotation of variants was performed using Annovar (Wang et al., 2010) with the following  
709 databases: refGene, cytoBand, exac03, avsnp150, clinvar\_20190305, gnomad211\_exome,  
710 dbnsfp35c, cosmic90. Intergenic variants were removed along with variants that were identified  
711 at greater than 0.001% of the population according to ExAC or gnomAD, or had a depth < 20.

#### 712 **Mutect2 raw callset:**

713 `gatk Mutect2 -R ref_fasta -I bam_tumor -tumor Id_tumor --germline-resource germline_resource`  
714 `-O raw_vcf`

#### 715 **Mutect2 filtering:**

716 `gatk FilterMutectCalls -V raw_vcf --stats raw_vcf_stats -R ref_fasta -O filtered_mutect2_vcf`

#### 717 **Copy number calling using GATK**

718 Base quality score recalibrated bams were used as the input. The covered regions for the  
719 exome kit were converted into bins (defining the resolution of the analysis) for coverage  
720 collection. Read-counts, that form the basis of copy number variant detection, were collected for  
721 each bin. The read-counts then go through denoising, modelling segments, and calling the final  
722 copy ratios.

#### 723 **Preprocess intervals**

724 `gatk PreprocessIntervals --intervals intervals_bed_file --padding 0 --bin-length 0 -R ref_fasta --`  
725 `interval-merging-rule OVERLAPPING_ONLY -O preprocessed_intervals_list`

726 **Collect read counts**

727 gatk CollectReadCounts -I sample\_bam -L preprocessed\_intervals} --interval-merging-rule  
728 OVERLAPPING\_ONLY -O sample.counts.hdf5

729 **Denoise read counts**

730 gatk DenoiseReadCounts -I sample.counts.hdf5 --standardized-copy-ratios  
731 sample\_std\_copy\_ratio --denoised-copy-ratios sample\_denoised\_copy\_ratio

732 **Model Segments**

733 gatk ModelSegments --denoised-copy-ratios denoised\_copy\_ratio --output-prefix id\_sample -O  
734 output\_dir

735 **Call copy ratio segments**

736 gatk CallCopyRatioSegments -I sample.modelled\_segments -O sampled.called.segments

737 **Cell line authentication**

738 Variant calls from the Mutect2 pipeline were filtered for each cell line to identify high confidence  
739 variants according to the filtering criteria above. These high confidence variants were then  
740 compared to the variants reported for all cell lines in the DepMap (<https://depmap.org/portal/>) for  
741 the Cancer Cell Line Encyclopedia (CCLE\_mutations\_hg38.csv, sample\_info.csv) and COSMIC  
742 (CosmicCLP\_MutantExport.tsv) as measured by the jaccard distance, the intersection of  
743 variants divided by the union of variants. Cells listed in CCLE or COSMIC were the rank ordered  
744 for each BCa cell line in this study according to the jaccard distance. Results are reported in  
745 **Table S13**.

746

747 **Metabolomics**

748 **Sample preparation**

749 Cell lines were cultured for several passages in IMDM + 10% FBS (IMDM10). Prior to  
750 experiment, cells were cultured in IMDM10 to ~80% confluence and then dissociated. For  
751 dissociation, cells were washed once with room temperature PBS and then incubated with PBS  
752 + 0.05% Trypsin-EDTA for 10-15 minutes. Cells were neutralized with IMDM10 and then fully  
753 dissociated by gentle pipetting. After dissociation, cells were counted by Trypan blue staining  
754 and then replated at 1e6 cells. 24 hours after plating, cells were treated with either IMDM10 or  
755 IMDM10 + 10 $\mu$ M cisplatin. Day 0 cell cultures were immediately processed for metabolomics  
756 analysis. To prepare cell pellets for metabolomics analysis, day 0 cells were dissociated and  
757 then centrifuged at 300RCF for 10 minutes at 4°C. Cells were suspended in PBS, centrifuged a  
758 second time, and then resuspended in PBS and counted. Day 0 cells were centrifuged a third  
759 time, the supernatants were aspirated, and the dry cell pellets were snap frozen in liquid  
760 nitrogen and stored at -80°C until metabolite extraction. 72 hours after plating, cells were  
761 processed for metabolomics analysis as described for the day 0 cell cultures.

762 **Data generation and analysis**

763 Metabolites from frozen cell pellets were extracted at 2e6 cells/mL in ice cold 5:3:2  
764 MeOH:acetonitrile:water. Extractions were carried out using vigorous vortexing for 30 min at  
765 4°C. Supernatants were clarified by centrifugation (10 min, 18,000 g, 4°C) and 10  $\mu$ L analyzed  
766 using a Thermo Vanquish UHPLC coupled to a Thermo Q Exactive mass spectrometer. Global  
767 metabolomics analyses were performed using a 5 min C18 gradient in positive and negative ion  
768 modes (separate runs) with electrospray ionization as described in (Gehrke et al., 2019;



769 Nemkov et al., 2019). For all analyses, the MS scanned in MS<sup>1</sup> mode across the m/z range of  
770 65 to 950. Peaks were annotated in conjunction with the KEGG database, integrated, and  
771 quality control performed using Maven as described in (Nemkov et al., 2015). Data was  
772 variance stabilization normalized (Huber et al., 2002), log<sub>2</sub>-transformed, and differential  
773 abundance calculations were done using limma (Ritchie et al., 2015) with time and/or treatment  
774 as covariates in the linear model.

775

## 776 **Cell Line Drug Treatments**

777 Gemcitabine (Sigma) and cisplatin (Sigma) stocks were resuspended in 0.9% saline solution  
778 and tosedostat (Sigma and BOC Sciences) was resuspended in DMSO. All stocks solutions  
779 were stored protected from light and kept frozen until use. For cell culture dose-response, cells  
780 were seeded in 96-well tissue culture plates with 500-2000 cells per well depending on growth  
781 rate and duration of experiment. Cells were seeded and allowed to attach overnight followed by  
782 replacing the media with fresh, pre-warmed media just prior to treatment. Drug dilutions were  
783 performed serially and using complete media (IMDM + 10% FBS) and the associated drug  
784 treatments. Growth inhibition was measured using confluence estimates over time on the  
785 IncuCyte ZOOM (Essen Bioscience, Ann Arbor, MI) over varying amounts of time depending on  
786 each experiment. Details for timing and replicates for each experiment are included in their  
787 respective figure legends.

788

## 789 **Antibodies and Western Blotting**

790 Whole cell lysates were prepared from cultured cells using RIPA lysis and extraction buffer  
791 (ThermoScientific). Lysates from xenograft tissues were prepared using tissue protein extraction  
792 reagent (T-PER) and glass tissue homogenizer. All lysates were prepared on ice and with the  
793 addition of Halt protease and phosphatase inhibitor cocktail and EDTA (ThermoFisher). Protein  
794 concentration of lysates were quantified with BCA protein assay (Pierce™, ThermoFisher). All  
795 lysates were prepared with 4X Licor Loading buffer with DTT added boiled for 10 minutes prior  
796 to gel loading. All western blots were run using PROTEAN TGX precast 4-15% or 4-20%  
797 gradient gels (Biorad) and transferred to either 0.2µm or 0.44µm nitrocellulose membranes.  
798 Transfer was done for 1.5-2hrs in cold TrisGlycine buffer (Biorad) with 20% methanol prior  
799 blocking for 1hr at room temperature in 5% BSA in TBS-T. Primary antibodies were diluted and  
800 incubated overnight at 4°C on a rocker. Membranes were washed 3 or 4 times in fresh TBS-T  
801 prior a 1 hour room temperature incubation in an appropriate secondary antibody. Membranes  
802 were washed 3-4 times in TBS-T, developed with enhanced SuperSignal West Pico Plus or  
803 SuperSignal West Femto (ThermoFisher) and imaged using Li-Cor Odyssey® Fc instrument.  
804 Densitometry was performed using LiCor Image Studio™ software. Statistical comparisons  
805 using densitometry measurements were done using a one-way ANOVA with Tukey post hoc to  
806 control for the experimentwise error rate.

807

## 808 **Cisplatin induced NPEPPS mRNA expression**

809 Total RNA was isolated from cells and organoids using Trizol (ThermoFisher) and standard  
810 phenol-chloroform based extraction methods. Residual DNA was digested with DNase I (Life  
811 technologies). cDNA synthesis was performed using Superscript II Reverse Transcriptase kit  
812 (Life technologies) using random primers. RT-qPCR reactions were performed on a CFX  
813 Connect Real-Time PCR Detection System thermocycler (Biorad) using TaqMan™ gene  
814 expression assays for NPEPPS and HMBS as a housekeeping gene (ThermoFisher) in  
815 combination with SensiFAST™ Probe No-ROX Kit (Bioline, Toronto, Canada). Expression data  
816 was calculated using  $2^{-\Delta\Delta C_t}$ . All cell line experiments were performed in triplicate from

817 independently grown cells. Comparisons were made between control treatment (0 $\mu$ M cisplatin)  
818 using a t-test.

819

### 820 **siRNA-mediated knockdown experiments**

821 NPEPPS and non-targeting siRNA smartpools were purchased from Horizon Discovery and  
822 resuspended in Dharmacon 5X siRNA Buffer. Transfections were performed using  
823 Lipofectamine RNAiMax (ThermoFisher) transfection reagent according to the manufacturer's  
824 specifications. Briefly, cells were grown to ~60% confluence in 6-well plates prior to being  
825 transfected and allowed to incubate overnight. The following day cells were trypsinized and  
826 replated into 96-well plates at 1000-2000 cells per well and allowed to attach overnight. Cells  
827 from the initial transfection were also replated into 6-well plates to collect protein and RNA to  
828 confirm knockdown. The following day, cells were treated using their previously established  
829 resistance doses of gemcitabine, cisplatin, or both (**Table S1**), and their relative growth rates  
830 were measured on the IncuCyte ZOOM (Essen Bioscience, Ann Arbor, MI) over time.

831

### 832 **shRNA-mediated knockdown experiments**

833 Lentiviral production and transduction were carried out by the University of Colorado Cancer  
834 Center Functional Genomics Shared Resources. Plasmids from The RNAi Consortium (TRC)  
835 collection (TRC construct numbers TRCN0000073838, TRCN0000073839 and  
836 TRCN0000073840) were used for targeting NPEPPS were selected based on predicted  
837 knockdown efficiency; non-targeting controls used were SHC002 and SHC016. 2 $\mu$ g of target  
838 shRNA construct and 2 $\mu$ g of 3:1 ratio of psPAX2 (Addgene) and pMD2.G (Addgene) were  
839 transfected into HEK293FT cells using 2  $\mu$ g of Polyethylenimine (Polysciences, Inc.). Lentiviral  
840 particle containing media was filtered using 0.45 $\mu$ m cellulose acetate syringe filter and used for  
841 transduction. Puromycin selection was performed at doses used for CRISPR library screening  
842 or in some cases, cells were re-selected with higher doses of puromycin (10 $\mu$ g/mL), in order to  
843 ensure complete elimination of non-transduced cells. Selected cells were frozen at early  
844 passage and early passage cells were used for all experiments.

845

### 846 **Intracellular cisplatin measurements using CyTOF**

847 Cell lines were cultured for several passages in IMDM + 10% FBS. Prior to experiment, cells  
848 were cultured in IMDM10 to be 50-80% confluence overnight and then treated the next day with  
849 varying concentrations of cisplatin or PBS as indicated and then dissociated after 4 hours of  
850 treatment. For dissociation, cells were washed twice with room temperature PBS and then  
851 incubated with PBS + 0.05% Trypsin-EDTA for 10-15 minutes. Cells were neutralized with  
852 IMDM10 and then fully dissociated into single-cell suspension by gentle pipetting. After  
853 dissociation, cells were counted by Trypan blue staining and then placed in separate tubes at 3  
854 x 10<sup>5</sup> cells. Individual samples were then fixed, permeabilized, and labeled using unique  
855 barcodes using the Cell-ID 20-plex Pd Barcoding kit (Fluidigm) according to the manufacturer  
856 protocol. Barcoded samples were pooled across cell line condition and cisplatin concentration,  
857 incubated with Cell-ID Intercalator-Ir, mixed with equilibration beads and acquired on a Helios  
858 mass cytometer (Fluidigm). Post-acquisition data were normalized to equilibration beads and  
859 debarcoded, using the bead-normalization and single-cell-debarcoder packages from the Nolan  
860 Laboratory GitHub page (<https://github.com/nolanlab>). Relative cisplatin intensity (defined by  
861 <sup>195</sup>Platinum isotopic mass intensity) was analyzed among nucleated <sup>191</sup>Iridium+ <sup>193</sup>Iridium+  
862 events (defined by Boolean gating within FlowJo 10.7.1).



863

## 864 **Whole Genome CRISPR Screening**

### 865 ***Plasmid library expansion and quality control***

866 Whole genome CRISPR Screening was performed using the Human CRISPR Knockout Pooled  
867 Library (Brunello) - 1 vector system (Addgene and a gift from John Doench to the Functional  
868 Genomics Facility at the University of Colorado Anschutz Medical Campus) (Doench et al.,  
869 2016b). Two distinct plasmid expansions were performed. And the library distribution was  
870 assessed using next generation sequencing to determine the impact on overall library was  
871 modest following re-expansion. Library width was calculated as previously described (Imkeller et  
872 al., 2020; Joung et al., 2017) by dividing the 10<sup>th</sup> percentile of the library distribution by the 90<sup>th</sup>  
873 percentile using the log2 average expression of all sgRNAs in the library and found to be 6.7  
874 and 7.13 for batch 1 and 2 respectively. All quality control metrics for each sample are reported  
875 in **Table S14**. Different screening parameters were used based on the cell line screened these  
876 are summarized in **Table S4**.

### 877 ***Lentivirus Production and Titration***

878 For the two plasmid batches, two distinct protocols for lentivirus production were utilized. The  
879 first batch was generated by using Polyethylenimine, linear (PEI; Polysciences Inc.) and the  
880 second using lipofectamine 3000. For the first batch, 293FT cells were seeded at a density of  
881 36,800 cells/cm<sup>2</sup> into a 4-layer CELLdisc (Greiner) using DMEM + 10% FBS along with  
882 Antibiotic and antimycotic solution. Transfection mix consisting 47.6µg pMD2G (Addgene),  
883 95.2µg of psPAX2 (Addgene), and 190.5µg of Brunello Whole genome knockout library  
884 (Addgene) was mixed with 448µl PEI (1 mg/mL) and 3mL OptiMEM, vortexed for 30 seconds  
885 and allowed to incubate at room temperature for 20 minutes. Fresh media containing  
886 transfection mix were added to the CELLdisc using up to 270mL of media. The next day media  
887 was changed for 280mL fresh media followed by a 48 hour incubation. After this 48 hour  
888 incubation the viral supernatant was harvested and filtered through a cellulose acetate filter  
889 system (ThermoScientific) and frozen at -80°C.

890 The first method had low functional virus titer, so we attempted a different virus production  
891 method for subsequent screens. In the second batch of virus production we utilized  
892 lipofectamine 3000 instead of PEI, eliminated use of multilayer flasks and centrifuged to remove  
893 debris as opposed to filtering. Briefly, 293FT cells were plated in T225 flasks to be 80%  
894 confluent after 24hrs. 2hrs before transfection, media was changed and 40mL of fresh media  
895 was used per T225 flask. The lipofectamine 3000 protocol was followed according to  
896 manufacturer's instructions and scaled based on the volume of virus being prepared. For each  
897 T225 flask 2mLOptiMEM was mixed with 40µg Brunello whole genome library plasmid, 30µg of  
898 psPAX2 and 20µg of pMD2.G and 180µl of P3000. This mix was added to a tube containing  
899 2mL OptiMEM and 128µl Lipofectamine 3000, which was scaled according to the number of  
900 T225 flasks being prepared. Transfection mix was mixed thoroughly by pipetting up and down  
901 slowly, and allowed to incubate at room temperature for 15 minutes. Transfection mix was then  
902 added dropwise to the plates of 293FT cells with gentle swirling and incubated overnight  
903 (~16hr). The following morning, the media was changed and 60mL of fresh media was added to  
904 each T225 flask. This was allowed to incubate overnight and replaced the following morning.  
905 This first lentiviral supernatant was stored at 4°C to be pooled with a subsequent 48 hour  
906 collection. Upon collection, viral supernatants had 1M HEPES added at 1%. Following the  
907 second virus collection, supernatants were pooled and centrifuged at 1250rpm for 5 minutes to  
908 pellet debris. Lentivirus was stored in polypropylene tubes as polystyrene is known to bind  
909 lentivirus, and all tubes were flash frozen in liquid nitrogen and stored at -80°C. Despite the

910 changes to the lentiviral production protocols, functional lentiviral titers were not improved using  
911 these changes to the methodology, but feel it is worth noting these changes in protocol to  
912 account for any possible variability associated with this change.

913 Lentivirus was titered functionally based on protocols adapted from the Broad Institute's Genetic  
914 Perturbation Platform's public web portal (<https://portals.broadinstitute.org/gpp/public/>).

### 915 **Screening Parameter Optimization**

916 All screening parameters for each cell lines including cell polybrene and puromycin sensitivity,  
917 screening coverage, technical and biological replicates performed, and gemcitabine and  
918 cisplatin treatment concentrations are reported in **Table S4**.

### 919 **DNA Isolation**

920 Cell pellets of  $2.0 \times 10^7$  were snap frozen in liquid nitrogen in 1.5mL tubes and stored at -80 prior  
921 to extraction. When possible at least  $8.0 \times 10^7$  cell were used for 4 separate genomic DNA  
922 isolation which were pooled to account for any variation with pellet size. DNA isolation was  
923 performed using the Puregene cell and tissue kit (Qiagen) with the addition of RNase A Solution  
924 (Qiagen) according to manufacturer's instructions. DNA concentration was measured in  
925 quadruplicate using either a nanodrop spectrophotometer (Thermo), Qubit® dsDNA assay (Life  
926 Technologies) and the average DNA content per cell was determined.

### 927 **Library preparation**

928 The minimum number of cell equivalents of gDNA to maintain equal coverage was used for  
929 library preparation. In all screens, the minimum coverage based on cell number was multiplied  
930 by the average gDNA content per cell for each individual cell line to determine the minimum  
931 number for 10µg PCR reactions needed to maintain coverage. A minimum coverage of 500-fold  
932 per sgRNA in the library was targeted for each independent sample or replicate but this was  
933 increased in some cases where screening was carried out with greater depth (see **Table S4** for  
934 coverage and replicate information).

935 Library preparation was performed using primers sequences designed by the Broad Institute's  
936 Genetic Perturbation Platform (<https://portals.broadinstitute.org/gpp/public/>) and utilized a pool  
937 of eight P5 primers with to introduce a stagger in reads associated with each library and sample  
938 specific P7 primer that contained a unique sample index sequence for each timepoint, replicate,  
939 or treatment condition to be sequenced in the same pool (**Table S11**). All library preparation  
940 primers were resuspended at 100µM.

941 Each library preparation PCR reaction contained the following components: 1µl Herculase II  
942 Fusion Enzyme (Agilent), 2.5µl Deoxynucleotide (dNTP) Solution Mix (New England Biolabs),  
943 0.5µl P5 primer pool, 0.5µl P7 index primer, 20µl 5X Reaction Buffer (Agilent), 10µg of gDNA  
944 and nuclease-free water to bring the total reaction volume to 100µl. Samples underwent 23  
945 cycles of thermal cycling followed by a quality assessment by electrophoresis on 2% agarose  
946 gel to ensure consistent library amplification across multiple wells and samples for each plate.

947 Each unique library had 10µl pooled from all PCR reactions performed on that unique sample  
948 and mixed thoroughly. 50-100µl of the pooled library preparation reactions was used to perform  
949 magnetic bead-based purification and elimination of any residual free primer using a 0.8X ratio  
950 SPRIselect beads (Beckman Coulter) according to the manufacturer's instructions. Libraries  
951 were then assessed for appropriate amplicon size and complete elimination of free primer peaks  
952 using the High Sensitivity ScreenTape Assay on the Tape Station2200 (Agilent) and quantified  
953 using the qPCR-based quantification in order to ensure only NGS-compatible amplicon was  
954 quantified using the Library Quant ROX Low Kit (Kapa Biosystems) on a QuantStudio™ 6

955 Realtime PCR System (ThermoFisher). Following qPCR quantification, all libraries were  
956 normalized to a standard concentration (typically 20-40nM) depending on the lowest  
957 concentration library to be pooled, and then requantified by qPCR to ensure all samples were  
958 within ~10-20% of the pool mean target concentration. After confirming accurate library  
959 quantification and normalization, samples were pooled at an equimolar ratio and submitted for  
960 sequencing. Libraries were sequenced on the NovaSeq 6000 instrument (Illumina) (150bp,  
961 paired-end) at the University of Colorado Cancer Center Genomics Shared Resource.

### 962 **CRISPR screening bioinformatic pipeline and analysis**

963 sgRNA counts were extracted directly from R1 raw sequence reads using a custom perl script  
964 that uses regular expression string matching to exactly match sgRNA sequence flanked by 10  
965 bases of vector sequence. The vector sequence was allowed to have one error before and after  
966 the sgRNA sequence. sgRNAs were tabulated for each sample based on the sgRNA sequence  
967 (**Table S15**). The sgRNA IDs of the Brunello library were updated to current HGNC gene names  
968 using the Total Approved Symbols download from HGNC, accessed on 9/1/2020  
969 (<https://www.genenames.org/download/statistics-and-files/>). Transcript IDs were matched when  
970 possible and when matches were not found, past symbols and aliases were updated to current  
971 names. Finally, 5 sgRNAs with missing updated gene names were manually curated using  
972 literature searches. Library distribution was calculated using the caRpoools R package (Winter et  
973 al., 2016) (**Table S11**). The DESeq2 R package (Love et al., 2014) was used to calculate  
974 differential abundance of genes (**Table S5**). Gene counts were generated using the sum of  
975 counts for sgRNAs of the same gene. Synthetic Lethality compared GemCis day 19 and  
976 GemCis day 25 vs. Saline day 19 and Saline day 25 with the day as a covariate. In the  
977 comparison integrating all cell lines, cell line was additionally modeled as a covariate. Gene  
978 essentiality was calculated by comparing Saline day 25 to Saline day 0 and in the integrated all  
979 cell lines comparison, cell line was modeled as a covariate. Common synthetic lethal genes  
980 were defined as being statistically significantly differentially lost (FDR < 0.05 and Log2 FC < 0)  
981 in each of the 5 cell lines. Gene set enrichment analysis (GSEA) was performed using the fgsea  
982 R package run with 10000 permutations (Sergushichev, 2016) with the KEGG and Reactome  
983 gene sets from MSigDB (Liberzon et al., 2011). Heatmaps were generated with the  
984 ComplexHeatmap R package following z-score transformation (Gu et al., 2016). Other plots  
985 were generated using the ggplot2 R package.

### 986 **Xenograft experiments**

987 Six-week-old, female Nu/J mice (Jackson Labs) were allowed to acclimate for at least one week  
988 prior to initiating any experiments. Mice had free access to food and water in pathogen-free  
989 housing and cared for in accordance NIH guidelines and all experiments were performed under  
990 protocols approved by the University of Colorado Denver Institutional Animal Care and Use  
991 Committee (IACUC).

992 For KU1919-GC xenografts, cells that had been stably transduced with non-targeting control  
993 (shCtrl1, SHC002) and NPEPPS (shN39, TRCN0000073839) shRNA constructs. Mice were  
994 divided into groups of 22 and 23 for the non-targeting control and NPEPPS shRNA constructs  
995 respectively. Mice were injected with  $4 \times 10^6$  cells in phenol red- and serum-free RPMI mixed  
996 with equal volume Matrigel Matrix (Corning) to total 100 $\mu$ l volume. Tumors were allowed to  
997 engraft for 9 days following injection and mice were randomized based on tumor volume within  
998 each shRNA condition into groups of 11 or 12 to be treated with combination gemcitabine plus  
999 cisplatin or DPBS. Treatment was initiated 13 days post-inoculation with dosing adjusted based  
1000 on individual mouse weight.

1001 Cisplatin (Sigma) and gemcitabine hydrochloride (BOC Sciences) were both resuspended in  
1002 0.9% saline and stored protected from light at -80°C as individual aliquots. Prior to treatment

1003 fresh aliquots of gemcitabine and cisplatin were thawed and diluted to their final concentration  
 1004 with 1X DPBS (Gibco). Mice were treated three times weekly on a Monday, Wednesday and  
 1005 Friday schedule for four weeks total. All mice in the gemcitabine plus cisplatin treated groups  
 1006 were given 50mg/kg gemcitabine and 2mg/kg cisplatin that were mixed and administered as a  
 1007 single intraperitoneal injection, while control mice were administered an equivalent volume of  
 1008 DPBS.

1009 Mouse health was monitored daily and all tumor volume measurements and weights were  
 1010 measured 3x weekly schedule. Tumor volume was calculated using the formula  $(L \times W^2)/2$ , for  
 1011 which  $L$  is the length of the long axis and  $W$  is the width of the axis perpendicular to the long  
 1012 axis measurement. All measurements were performed using digital calipers. Animal were  
 1013 humanely euthanized with CO<sub>2</sub> followed by cervical dislocation when tumors reached a  
 1014 predetermined endpoint of 2cm<sup>3</sup> or when weight loss exceeded 15% body weight. Mice that  
 1015 were removed from study due to weight loss were censored in the survival analyses.

### 1016 Linear mixed-effects model of tumor growth

1017 Linear mixed-effects models were used to model longitudinal observations of xenograft tumor  
 1018 growth volumes normalized by their corresponding baseline volume. Mixed-effects models from  
 1019 the R-package *lme4* (Bates et al., 2015) and Satterthwaite's approximation for degrees of  
 1020 freedom for the fixed effects from *lmerTest* (Kuznetsova et al., 2017) were used for model fitting  
 1021 and inspection in the R statistical software (4.0.3). Volume changes compared to baseline were  
 1022 log<sub>2</sub>-transformed. The final model was structured as:

$$1023 \quad \log_2 \left( \frac{y_{i,t}}{y_{i,0}} \right) = \beta_0 + \beta_1 x_{i,t} + \beta_2 x_{i,t}^2 + \beta_3 x_{i,t} KD_i + \beta_4 x_{i,t} GC_i + \beta_5 x_{i,t} KD_i GC_i + \gamma_{0,i} + \gamma_{1,i} x_{i,t} + \varepsilon_{i,t}$$

1024 where  $\beta$  is the fixed effects capturing population-level trends,  $\gamma$  is the normally distributed  
 1025 random effects capturing individual-level variation,  $\varepsilon$  is the i.i.d. normally distributed residual  
 1026 term,  $i$  is the unique individual identifier,  $t$  notes the time points,  $x_{i,t} \in$   
 1027  $\{2, 4, 5, 7, 9, 11, 14, 16, 18, 21, 23, 25, 28\}$  depicted days since initiating interventions,  $y_{i,0}$  is tumour  
 1028 volume at baseline prior to treatments upon randomization, and  $y_{i,t}$  were the observed tumour  
 1029 volumes over the treatment period measured in mm<sup>3</sup>. The model was fit using Restricted  
 1030 Maximum Likelihood and built iteratively until the underlying model assumptions and model  
 1031 convergence criteria were met. To this end, a quadratic growth term ( $\beta_2$ ) was added on top of  
 1032 the linear growth term ( $\beta_1$ ) and intercept ( $\beta_0$ ), allowing slightly non-linear relative growth patterns  
 1033 to be captured by the otherwise linear model. Binary indicators  $KD_i \in \{0,1\}$  and  $GC_i \in \{0,1\}$  were  
 1034 used to model knockdown of NPEPPS (KD), GemCis therapy (GC), or both combined. The  
 1035 corresponding model terms were captured in  $\beta_3$ ,  $\beta_4$  and  $\beta_5$ , respectively. Finally, the model  
 1036 allows for individual-specific random effects for intercept ( $\gamma_{0,i}$ ) and linear growth slope ( $\gamma_{1,i}$ ).  
 1037 Shapiro-Wilk test was used to examine the underlying normality assumption for  $\gamma_{0,i}$  and  $\gamma_{1,i}$  with  
 1038  $p=0.1373$  and  $p=8901$ , respectively, indicating that these random effects followed underlying  
 1039 assumptions of normality. After inspection of the residual plots (**Figure S9B**), this final model  
 1040 was deemed suitable for population-level statistical inference via the fixed effects. This  
 1041 population-level model fits are visualized in **Figure S9A**. These population-level estimates are  
 1042 as follows:

| Fixed effect                | Estimate | Std. error | df    | t      | p-val        |
|-----------------------------|----------|------------|-------|--------|--------------|
| $\beta_0$ (intercept)       | 0.05054  | 0.08422    | 54.28 | 0.600  | 0.55091      |
| $\beta_1$ (linear slope)    | 0.1236   | 0.01493    | 65.52 | 8.276  | 8.92e-12 *** |
| $\beta_2$ (quadratic slope) | 0.00308  | 0.0002242  | 389   | 13.740 | < 2e-16 ***  |
| $\beta_3$ (knockdown)       | -0.0605  | 0.01821    | 44.97 | -3.322 | 0.00178 **   |
| $\beta_4$ (GC)              | -0.1063  | 0.01821    | 44.97 | -5.837 | 5.49e-07 *** |



|                            |         |         |       |        |              |
|----------------------------|---------|---------|-------|--------|--------------|
| $\beta_5$ (knockdown + GC) | -0.1233 | 0.01791 | 45.28 | -6.884 | 1.47e-08 *** |
|----------------------------|---------|---------|-------|--------|--------------|

1044

## 1045 **Survival analyses from TCGA**

1046 Copy number and gene expression data for patients with muscle-invasive bladder cancer in the  
1047 TCGA cohort (PanCancer Atlas) were downloaded from cBioPortal (Cerami et al., 2012; Gao et  
1048 al., 2013). Patient survival and platinum-based treatment annotation was from our previous work  
1049 (Goodspeed et al., 2019). Patients were separated into treatment groups, platinum-based  
1050 treatment (n = 100) or unrecorded treatment (n = 204), and then stratified based on copy  
1051 number gain or amplification, or mRNA upregulation (z-score > 1) of LRRC8A or LRRC8D. The  
1052 Logrank test was used to test the difference in overall survival between the stratified patient  
1053 groups.

## 1054 **Tumor-derived Organoids**

### 1055 ***Culture of the organoids***

1056 Human bladder tissue was obtained from the Erasmus MC Bladder Cancer Center, Rotterdam,  
1057 the Netherlands. Bladder tumor-derived organoids from biopsies obtained through TURBT or  
1058 cystectomy were isolated and cultured using a method based on (Mullenders et al., 2019) with  
1059 modifications (Akbarzadeh/Scholtes et al. in prep). Briefly, Bladder tissues were washed with  
1060 Advanced DMEM/F12 (Gibco) supplemented with 10mM HEPES (Gibco), 1% GlutaMax (Gibco)  
1061 and 100  $\mu$ g/ml primocin (InvivoGen), henceforth Ad+++ . Tissue was minced and incubated at  
1062 37°C with the digestion solution (collagenase 2.5mg/ml in EBSS) and isolated cells were passed  
1063 through 70 $\mu$ m strainer (Falcon), washed with Ad+++ and seeded in 50  $\mu$ l drops of BME (R&D  
1064 system) containing 10000-15000 cells in 24 well suspension plates (Greiner). Bladder tumor  
1065 organoids were cultured in a culture medium containing Ad+++ supplemented with 1  $\times$  B-27  
1066 (Gibco), 1.25 mM N-acetylcysteine (Sigma), 10 mM nicotinamide, 20 $\mu$ M TGF $\beta$  receptor inhibitor  
1067 A83-01, 100ng/ml recombinant human FGF10 (Peprotech), 25 ng/ml recombinant human FGF7  
1068 (Peprotech), 12.5 ng/ml recombinant human FGF2 (Peprotech), 10 $\mu$ M Y27632 Rho Kinase  
1069 (ROCK) Inhibitor (Sigma) and conditioned media for recombinant Rspodin (2.5% v/v), and  
1070 Wnt3A (2.5% v/v). The medium was changed every three days. Organoids were passaged at a  
1071 1:3 to 1:6 ratio every 7 days using cell dissociation solution- non enzymatic (Sigma) and plated  
1072 in fresh BME matrix droplets.

### 1073 ***Drug screening***

1074 Organoids were collected 7 days after passaging, passed through a 100 $\mu$ m strainer and 1000  
1075 organoids were seeded per well of a 48-well plate in BME matrix droplets. After 24h, cisplatin  
1076 (Sigma) resuspended in PBS was added at different concentrations (2, 10, 25, and 50  $\mu$ M) with  
1077 or without tosedostat (20  $\mu$ M) (Tocris) resuspended in DMSO. Organoids were cultured for the  
1078 first 6 days in the presence of drugs followed by drug withdrawal, where organoids were grown  
1079 in organoid culture media for 10 days. The entire content of the wells in different treatment  
1080 groups was collected, washed and reseeded after disaggregation in fresh BME, and cultured for  
1081 6 days. Cell viability was assayed using alamarBlue (Invitrogen) according to the manufacturer's  
1082 instructions after 6 days of drug incubation, 10 days of drug withdrawal, and 6 days post  
1083 reseeded. Viability data was normalized using organoid wells treated with vehicle control.

### 1084 ***SNaPshot mutation and microarray analysis***

1085 Tumor, organoid, and matched normal DNA was isolated using with the QIAmp DNA Mini-Kit  
1086 (Qiagen) according to the manufacturer's protocol. Presence of hotspot mutations in the *TERT*  
1087 promoter sequence chr5:1,295,228C>T, chr5:1,295,248G>A and chr5:1,295,250C>T  
1088 [GRCh37/hg19]), *FGFR3* (R248Q/E, S249C, G372C, Y375C, A393E, K652E/M) and *PIK3CA*

1089 (E542K, E545G/K and H1047R) were assessed on tumor, normal and organoid DNA by  
1090 SNaPshot mutation analysis with the same methods as previously described (Allory et al., 2014;  
1091 Hurst et al., 2009; Junker et al., 2008). Copy number aberration analysis was performed using  
1092 single-nucleotide polymorphism (SNP) microarrays (Affymetrix GSA V3, Affymetrix) on primary  
1093 tumor DNA, matched DNA collected from normal urothelium plus stromal tissue from the same  
1094 sample but from a distant location from the tumor, and organoid DNA using standard protocols.  
1095 SNP data (log-R ratio, B-allele frequency) were visualized to identify potential CNVs via  
1096 Biodiscovery Nexus CN7.5. (Biodiscovery) and the GenomeStudio genotyping module  
1097 (Illumina).

### 1098 **Organoid phenotyping and tumor histology**

1099 Tissue processing and H&E staining was performed using standard procedures. For  
1100 hematoxylin-eosin (H&E) staining of organoids, wells of BME-embedded organoids were fixated  
1101 with 4% formalin (Sigma) and 0.15% glutaraldehyde (produced in-house) at room temperature  
1102 for 2 hours. Fixated BME and organoids were washed with PBS and engulfed in 2.5% Low-  
1103 Melting Agarose (Sigma) prior to paraffin embedding. H&E staining was performed on 4µM  
1104 paraffin sections of both tumor and organoid tissue. Stained whole-slides, as well as prior 3D  
1105 organoid cultures were imaged by bright-field microscopy (Olympus IX70).

1106

### 1107 **Acknowledgements**

1108 We would like to thank Megan Tu, Colin Sempeck, Ana Chauca-Diaz, Jason Duex, and Charles  
1109 Owens for their help throughout this project. This work was generously supported by the  
1110 Anschutz Foundation to J.C.C., CA180175 to D.T., FICAN Cancer Researcher by the Finnish  
1111 Cancer Institute to T.D.L., Erasmus MC mRACE grant 111296 to T.M. and T.Z., Erasmus MC  
1112 fellowship project 107088 to T.Z., and training grants GM007635 and GM008497 supported  
1113 R.T.J. This work utilized the Functional Genomics Facility, Biostatistics and Bioinformatics  
1114 Shared Resource, Genomics Shared Resource, and Flow Cytometry Shared Resource  
1115 supported by CA046934.

1116

### 1117 **Author Contributions**

1118 Conceptualization: R.T.J., T.M., T.Z., D.T., J.C.C.  
1119 Methodology: R.T.J., A.G., M.S., H.V., A.J., T.D.L., M.A., E.C., S.P., T.M., T.Z., D.T., J.C.C.  
1120 Software: A.G., T.D.L., M.J., R.L., J.C.C.  
1121 Validation: R.T.J., A.G., M.S., A.J., C.T., M.V.O., T.Z.  
1122 Formal Analysis: R.T.J., A.G., M.S., H.V., T.D.L., M.V.O., M.J., E.C., S.P., T.Z., D.T., J.C.C.  
1123 Investigation: R.T.J., M.A., M.S., H.V., A.J., C.T., M.V.O., E.C., S.P., T.Z., J.C.C.  
1124 Resources: A.J., C.T., E.C., R.L., T.Z.  
1125 Data Curation: R.T.J., A.G., A.J., T.D.L., M.J., R.L., J.C.C.  
1126 Writing – Original Draft: R.T.J., A.G., D.T., J.C.C.  
1127 Writing – Review & Editing: R.T.J., A.G., M.A., M.S., H.V., M.V.O., M.J., T.D.L., E.C., S.P., T.M.,  
1128 T.Z., D.T., J.C.C.  
1129 Visualization: R.T.J., A.G., M.A., M.S., M.V.O., T.D.L., E.C., T.Z., D.T., J.C.C.  
1130 Supervision: R.L., T.M., D.T., T.Z., J.C.C.  
1131 Project Administration: R.T.J., A.J., T.M., T.Z., D.T., J.C.C.  
1132 Funding Acquisition: T.M., T.Z., D.T., J.C.C.

1133

### 1134 **Declaration of Interests**

1135 J.C.C. is co-founder of PrecisionProfile.

1136

1137

1138 **References**

1139

1140 1000 Genomes Project Consortium, Auton, A., Brooks, L.D., Durbin, R.M., Garrison, E.P., Kang,  
1141 H.M., Korbelt, J.O., Marchini, J.L., McCarthy, S., McVean, G.A., et al. (2015). A global reference  
1142 for human genetic variation. *Nature* 526, 68–74.

1143 Allory, Y., Beukers, W., Sagera, A., Flández, M., Marqués, M., Márquez, M., van der Keur, K.A.,  
1144 Dyrskjot, L., Lurkin, I., Vermeij, M., et al. (2014). Telomerase reverse transcriptase promoter  
1145 mutations in bladder cancer: high frequency across stages, detection in urine, and lack of  
1146 association with outcome. *Eur. Urol.* 65, 360–366.

1147 Balar, A.V., Galsky, M.D., Rosenberg, J.E., Powles, T., Petrylak, D.P., Bellmunt, J., Loriot, Y.,  
1148 Necchi, A., Hoffman-Censits, J., Perez-Gracia, J.L., et al. (2017a). Atezolizumab as first-line  
1149 treatment in cisplatin-ineligible patients with locally advanced and metastatic urothelial  
1150 carcinoma: a single-arm, multicentre, phase 2 trial. *Lancet Lond. Engl.* 389, 67–76.

1151 Balar, A.V., Castellano, D., O'Donnell, P.H., Grivas, P., Vuky, J., Powles, T., Plimack, E.R., Hahn,  
1152 N.M., de Wit, R., Pang, L., et al. (2017b). First-line pembrolizumab in cisplatin-ineligible patients  
1153 with locally advanced and unresectable or metastatic urothelial cancer (KEYNOTE-052): a  
1154 multicentre, single-arm, phase 2 study. *Lancet Oncol.* 18, 1483–1492.

1155 Bates, D., Mächler, M., Bolker, B., and Walker, S. (2015). Fitting Linear Mixed-Effects Models  
1156 Using lme4. *J. Stat. Softw.* 67, 1–48.

1157 Behan, F.M., Iorio, F., Picco, G., Gonçalves, E., Beaver, C.M., Migliardi, G., Santos, R., Rao, Y.,  
1158 Sassi, F., Pinnelli, M., et al. (2019). Prioritization of cancer therapeutic targets using CRISPR–  
1159 Cas9 screens. *Nature* 568, 511–516.

1160 Benjamin, D., Sato, T., Cibulskis, K., Getz, G., Stewart, C., and Lichtenstein, L. (2019). Calling  
1161 Somatic SNVs and Indels with Mutect2. *BioRxiv* 861054.

1162 Bepler, G., Kusmartseva, I., Sharma, S., Gautam, A., Cantor, A., Sharma, A., and Simon, G.  
1163 (2006). RRM1 modulated in vitro and in vivo efficacy of gemcitabine and platinum in non-small-  
1164 cell lung cancer. *J. Clin. Oncol. Off. J. Am. Soc. Clin. Oncol.* 24, 4731–4737.

1165 Bergman, A.M., Eijk, P.P., Ruiz van Haperen, V.W.T., Smid, K., Veerman, G., Hubeek, I., van den  
1166 Ijssel, P., Ylstra, B., and Peters, G.J. (2005). In vivo induction of resistance to gemcitabine results  
1167 in increased expression of ribonucleotide reductase subunit M1 as the major determinant.  
1168 *Cancer Res.* 65, 9510–9516.

1169 Berle, M., Ghila, L., Vethe, H., Chaudhry, A., Garberg, H., Beisland, C., Haaland, Ø.A., Oveland,  
1170 E., Halvorsen, O.J., Davidsson, T., et al. (2018). Novel protein signatures suggest progression to  
1171 muscular invasiveness in bladder cancer. *PLoS One* 13, e0206475.



- 1172 Bray, F., Ferlay, J., Soerjomataram, I., Siegel, R.L., Torre, L.A., and Jemal, A. (2018). Global cancer  
1173 statistics 2018: GLOBOCAN estimates of incidence and mortality worldwide for 36 cancers in  
1174 185 countries. *CA. Cancer J. Clin.* *68*, 394–424.
- 1175 Cerami, E., Gao, J., Dogrusoz, U., Gross, B.E., Sumer, S.O., Aksoy, B.A., Jacobsen, A., Byrne, C.J.,  
1176 Heuer, M.L., Larsson, E., et al. (2012). The cBio Cancer Genomics Portal: An Open Platform for  
1177 Exploring Multidimensional Cancer Genomics Data. *Cancer Discov.* *2*, 401–404.
- 1178 Chang, Q., Ornatsky, O.I., Koch, C.J., Chaudary, N., Marie-Egyptienne, D.T., Hill, R.P., Tanner,  
1179 S.D., and Hedley, D.W. (2015). Single-cell measurement of the uptake, intratumoral distribution  
1180 and cell cycle effects of cisplatin using mass cytometry. *Int. J. Cancer* *136*, 1202–1209.
- 1181 Choi, M., Chang, C.-Y., Clough, T., Broudy, D., Killeen, T., MacLean, B., and Vitek, O. (2014).  
1182 MSstats: an R package for statistical analysis of quantitative mass spectrometry-based  
1183 proteomic experiments. *Bioinforma. Oxf. Engl.* *30*, 2524–2526.
- 1184 Clasquin, M.F., Melamud, E., and Rabinowitz, J.D. (2012). LC-MS data processing with MAVEN: a  
1185 metabolomic analysis and visualization engine. *Curr. Protoc. Bioinforma. Chapter 14*, Unit14.11.
- 1186 Compagnone, M., Cifaldi, L., and Fruci, D. (2019). Regulation of ERAP1 and ERAP2 genes and  
1187 their dysfunction in human cancer. *Hum. Immunol.* *80*, 318–324.
- 1188 Constam, D.B., Tobler, A.R., Rensing-Ehl, A., Kemler, I., Hersh, L.B., and Fontana, A. (1995).  
1189 Puromycin-sensitive aminopeptidase. Sequence analysis, expression, and functional  
1190 characterization. *J. Biol. Chem.* *270*, 26931–26939.
- 1191 Cortes, J., Feldman, E., Yee, K., Rizzieri, D., Advani, A.S., Charman, A., Spruyt, R., Toal, M., and  
1192 Kantarjian, H. (2013). Two dosing regimens of tosedostat in elderly patients with relapsed or  
1193 refractory acute myeloid leukaemia (OPAL): a randomised open-label phase 2 study. *Lancet*  
1194 *Oncol.* *14*, 354–362.
- 1195 Cowley, G.S., Weir, B.A., Vazquez, F., Tamayo, P., Scott, J.A., Rusin, S., East-Seletsky, A., Ali, L.D.,  
1196 Gerath, W.F., Pantel, S.E., et al. (2014). Parallel genome-scale loss of function screens in 216  
1197 cancer cell lines for the identification of context-specific genetic dependencies. *Sci. Data* *1*,  
1198 140035.
- 1199 Dempster, J.M., Krill-Burger, J., Warren, A., McFarland, J.M., Golub, T.R., and Tsherniak, A.  
1200 (2020). Gene expression has more power for predicting in vitro cancer cell vulnerabilities than  
1201 genomics. *BioRxiv* 2020.02.21.959627.
- 1202 Dilruba, S., and Kalayda, G.V. (2016). Platinum-based drugs: past, present and future. *Cancer*  
1203 *Chemother. Pharmacol.* *77*, 1103–1124.
- 1204 Dobin, A., Davis, C.A., Schlesinger, F., Drenkow, J., Zaleski, C., Jha, S., Batut, P., Chaisson, M.,  
1205 and Gingeras, T.R. (2013). STAR: ultrafast universal RNA-seq aligner. *Bioinforma. Oxf. Engl.* *29*,  
1206 15–21.

- 1207 Doench, J.G., Fusi, N., Sullender, M., Hegde, M., Vaimberg, E.W., Donovan, K.F., Smith, I.,  
1208 Tothova, Z., Wilen, C., Orchard, R., et al. (2016a). Optimized sgRNA design to maximize activity  
1209 and minimize off-target effects of CRISPR-Cas9. *Nat. Biotechnol.* *34*, 184–191.
- 1210 Doench, J.G., Fusi, N., Sullender, M., Hegde, M., Vaimberg, E.W., Donovan, K.F., Smith, I.,  
1211 Tothova, Z., Wilen, C., Orchard, R., et al. (2016b). Optimized sgRNA design to maximize activity  
1212 and minimize off-target effects of CRISPR-Cas9. *Nat. Biotechnol.* *34*, 184–191.
- 1213 Drayton, R.M., and Catto, J.W. (2012). Molecular mechanisms of cisplatin resistance in bladder  
1214 cancer. *Expert Rev. Anticancer Ther.* *12*, 271–281.
- 1215 Drinkwater, N., Lee, J., Yang, W., Malcolm, T.R., and McGowan, S. (2017). M1 aminopeptidases  
1216 as drug targets: broad applications or therapeutic niche? *FEBS J.* *284*, 1473–1488.
- 1217 Faust, G.G., and Hall, I.M. (2014). SAMBLASTER: fast duplicate marking and structural variant  
1218 read extraction. *Bioinforma. Oxf. Engl.* *30*, 2503–2505.
- 1219 FlowJo (2019). FlowJo Software (for Mac) (Becton, Dickenson and Company).
- 1220 Galluzzi, L., Senovilla, L., Vitale, I., Michels, J., Martins, I., Kepp, O., Castedo, M., and Kroemer,  
1221 G. (2012). Molecular mechanisms of cisplatin resistance. *Oncogene* *31*, 1869–1883.
- 1222 Galsky, M.D., Pal, S.K., Lin, S.-W., Ogale, S., Zivkovic, M., Simpson, J., Derleth, C., Schiff, C., and  
1223 Sonpavde, G. (2018). Real-World Effectiveness of Chemotherapy in Elderly Patients With  
1224 Metastatic Bladder Cancer in the United States. *Bladder Cancer Amst. Neth.* *4*, 227–238.
- 1225 Galsky, M.D., Arija, J.Á.A., Bamias, A., Davis, I.D., De Santis, M., Kikuchi, E., Garcia-Del-Muro, X.,  
1226 De Giorgi, U., Mencinger, M., Izumi, K., et al. (2020). Atezolizumab with or without  
1227 chemotherapy in metastatic urothelial cancer (IMvigor130): a multicentre, randomised,  
1228 placebo-controlled phase 3 trial. *Lancet Lond. Engl.* *395*, 1547–1557.
- 1229 Gao, J., Aksoy, B.A., Dogrusoz, U., Dresdner, G., Gross, B., Sumer, S.O., Sun, Y., Jacobsen, A.,  
1230 Sinha, R., Larsson, E., et al. (2013). Integrative Analysis of Complex Cancer Genomics and Clinical  
1231 Profiles Using the cBioPortal. *Sci. Signal.* *6*, pl1–pl1.
- 1232 Gehrke, S., Rice, S., Stefanoni, D., Wilkerson, R.B., Nemkov, T., Reisz, J.A., Hansen, K.C., Lucas,  
1233 A., Cabrales, P., Drew, K., et al. (2019). Red Blood Cell Metabolic Responses to Torpor and  
1234 Arousal in the Hibernator Arctic Ground Squirrel. *J. Proteome Res.* *18*, 1827–1841.
- 1235 Goodspeed, A., Jean, A., and Costello, J.C. (2019). A Whole-genome CRISPR Screen Identifies a  
1236 Role of MSH2 in Cisplatin-mediated Cell Death in Muscle-invasive Bladder Cancer. *Eur. Urol.* *75*,  
1237 242–250.
- 1238 Grossman, H.B., Natale, R.B., Tangen, C.M., Speights, V.O., Vogelzang, N.J., Trump, D.L., White,  
1239 R.W. deVere, Sarosdy, M.F., Wood, D.P., Raghavan, D., et al. (2003). Neoadjuvant

- 1240 Chemotherapy plus Cystectomy Compared with Cystectomy Alone for Locally Advanced Bladder  
1241 Cancer. *N. Engl. J. Med.* *349*, 859–866.
- 1242 Gu, Z., Eils, R., and Schlesner, M. (2016). Complex heatmaps reveal patterns and correlations in  
1243 multidimensional genomic data. *Bioinformatics* *32*, 2847–2849.
- 1244 van Herpen, C.M.L., Eskens, F. a. L.M., de Jonge, M., Desar, I., Hooftman, L., Bone, E.A., Timmer-  
1245 Bonte, J.N.H., and Verweij, J. (2010). A Phase Ib dose-escalation study to evaluate safety and  
1246 tolerability of the addition of the aminopeptidase inhibitor tosedostat (CHR-2797) to paclitaxel  
1247 in patients with advanced solid tumours. *Br. J. Cancer* *103*, 1362–1368.
- 1248 Hitzerd, S.M., Verbrugge, S.E., Ossenkoppele, G., Jansen, G., and Peters, G.J. (2014). Positioning  
1249 of aminopeptidase inhibitors in next generation cancer therapy. *Amino Acids* *46*, 793–808.
- 1250 Huang, A., Garraway, L.A., Ashworth, A., and Weber, B. (2020). Synthetic lethality as an engine  
1251 for cancer drug target discovery. *Nat. Rev. Drug Discov.* *19*, 23–38.
- 1252 Huber, W., von Heydebreck, A., Sülthmann, H., Poustka, A., and Vingron, M. (2002). Variance  
1253 stabilization applied to microarray data calibration and to the quantification of differential  
1254 expression. *Bioinforma. Oxf. Engl.* *18 Suppl 1*, S96-104.
- 1255 Hurst, C.D., Zuiverloon, T.C.M., Hafner, C., Zwarthoff, E.C., and Knowles, M.A. (2009). A  
1256 SNaPshot assay for the rapid and simple detection of four common hotspot codon mutations in  
1257 the PIK3CA gene. *BMC Res. Notes* *2*, 66.
- 1258 Huttlin, E.L., Bruckner, R.J., Navarrete-Perea, J., Cannon, J.R., Baltier, K., Gebreab, F., Gygi, M.P.,  
1259 Thornock, A., Zarraga, G., Tam, S., et al. (2020). Dual Proteome-scale Networks Reveal Cell-  
1260 specific Remodeling of the Human Interactome. *BioRxiv* 2020.01.19.905109.
- 1261 Imkeller, K., Ambrosi, G., Boutros, M., and Huber, W. (2020). gscreen: modelling asymmetric  
1262 count ratios in CRISPR screens to decrease experiment size and improve phenotype detection.  
1263 *Genome Biol.* *21*, 53.
- 1264 Jordheim, L.P., Sève, P., Trédan, O., and Dumontet, C. (2011). The ribonucleotide reductase  
1265 large subunit (RRM1) as a predictive factor in patients with cancer. *Lancet Oncol.* *12*, 693–702.
- 1266 Jost, M., and Weissman, J.S. (2018). CRISPR Approaches to Small Molecule Target Identification.  
1267 *ACS Chem. Biol.* *13*, 366–375.
- 1268 Joung, J., Konermann, S., Gootenberg, J.S., Abudayyeh, O.O., Platt, R.J., Bringham, M.D., Sanjana,  
1269 N.E., and Zhang, F. (2017). Genome-scale CRISPR-Cas9 knockout and transcriptional activation  
1270 screening. *Nat. Protoc.* *12*, 828–863.
- 1271 Junker, K., van Oers, J.M.M., Zwarthoff, E.C., Kania, I., Schubert, J., and Hartmann, A. (2008).  
1272 Fibroblast growth factor receptor 3 mutations in bladder tumors correlate with low frequency  
1273 of chromosome alterations. *Neoplasia N. Y. N* *10*, 1–7.

- 1274 Karczewski, K.J., Francioli, L.C., Tiao, G., Cummings, B.B., Alföldi, J., Wang, Q., Collins, R.L.,  
1275 Laricchia, K.M., Ganna, A., Birnbaum, D.P., et al. (2020). The mutational constraint spectrum  
1276 quantified from variation in 141,456 humans. *Nature* 581, 434–443.
- 1277 Karsten, S.L., Sang, T.-K., Gehman, L.T., Chatterjee, S., Liu, J., Lawless, G.M., Sengupta, S., Berry,  
1278 R.W., Pomakian, J., Oh, H.S., et al. (2006). A genomic screen for modifiers of tauopathy  
1279 identifies puromycin-sensitive aminopeptidase as an inhibitor of tau-induced  
1280 neurodegeneration. *Neuron* 51, 549–560.
- 1281 Kasuya, G., Nakane, T., Yokoyama, T., Jia, Y., Inoue, M., Watanabe, K., Nakamura, R., Nishizawa,  
1282 T., Kusakizako, T., Tsutsumi, A., et al. (2018). Cryo-EM structures of the human volume-  
1283 regulated anion channel LRRC8. *Nat. Struct. Mol. Biol.* 25, 797–804.
- 1284 Korotkevich, G., Sukhov, V., and Sergushichev, A. (2019). Fast gene set enrichment analysis.  
1285 *BioRxiv* 060012.
- 1286 Krige, D., Needham, L.A., Bawden, L.J., Flores, N., Farmer, H., Miles, L.E.C., Stone, E., Callaghan,  
1287 J., Chandler, S., Clark, V.L., et al. (2008). CHR-2797: an antiproliferative aminopeptidase  
1288 inhibitor that leads to amino acid deprivation in human leukemic cells. *Cancer Res.* 68, 6669–  
1289 6679.
- 1290 Kudo, L.C., Parfenova, L., Ren, G., Vi, N., Hui, M., Ma, Z., Lau, K., Gray, M., Bardag-Gorce, F.,  
1291 Wiedau-Pazos, M., et al. (2011). Puromycin-sensitive aminopeptidase (PSA/NPEPPS) impedes  
1292 development of neuropathology in hPSA/TAU(P301L) double-transgenic mice. *Hum. Mol.*  
1293 *Genet.* 20, 1820–1833.
- 1294 Kuznetsova, A., Brockhoff, P.B., and Christensen, R.H.B. (2017). ImerTest Package: Tests in  
1295 Linear Mixed Effects Models. *J. Stat. Softw.* 82, 1–26.
- 1296 Landrum, M.J., Lee, J.M., Benson, M., Brown, G.R., Chao, C., Chitipiralla, S., Gu, B., Hart, J.,  
1297 Hoffman, D., Jang, W., et al. (2018). ClinVar: improving access to variant interpretations and  
1298 supporting evidence. *Nucleic Acids Res.* 46, D1062–D1067.
- 1299 Laver, T.W., Franco, E.D., Johnson, M.B., Patel, K., Ellard, S., Weedon, M.N., Flanagan, S.E., and  
1300 Wakeling, M.N. (2019). SavvyCNV: genome-wide CNV calling from off-target reads. *BioRxiv*  
1301 617605.
- 1302 Li, H. (2013). Aligning sequence reads, clone sequences and assembly contigs with BWA-MEM.  
1303 *ArXiv13033997 Q-Bio*.
- 1304 Li, H., Handsaker, B., Wysoker, A., Fennell, T., Ruan, J., Homer, N., Marth, G., Abecasis, G., and  
1305 Durbin, R. (2009). The Sequence Alignment/Map format and SAMtools. *Bioinformatics* 25,  
1306 2078–2079.
- 1307 Liberzon, A., Subramanian, A., Pinchback, R., Thorvaldsdóttir, H., Tamayo, P., and Mesirov, J.P.  
1308 (2011). Molecular signatures database (MSigDB) 3.0. *Bioinformatics* 27, 1739–1740.

- 1309 Lim, Y.W., Chen-Harris, H., Mayba, O., Lianoglou, S., Wuster, A., Bhangale, T., Khan, Z.,  
1310 Mariathan, S., Daemen, A., Reeder, J., et al. (2018). Germline genetic polymorphisms  
1311 influence tumor gene expression and immune cell infiltration. *Proc. Natl. Acad. Sci.* *115*,  
1312 E11701–E11710.
- 1313 Liston, D.R., and Davis, M. (2017). Clinically Relevant Concentrations of Anticancer Drugs: A  
1314 Guide for Nonclinical Studies. *Clin. Cancer Res. Off. J. Am. Assoc. Cancer Res.* *23*, 3489–3498.
- 1315 Love, M.I., Huber, W., and Anders, S. (2014). Moderated estimation of fold change and  
1316 dispersion for RNA-seq data with DESeq2. *Genome Biol.* *15*, 550.
- 1317 Löwenberg, B., Morgan, G., Ossenkoppele, G.J., Burnett, A.K., Zachée, P., Dührsen, U., Dierickx,  
1318 D., Müller-Tidow, C., Sonneveld, P., Krug, U., et al. (2010). Phase I/II clinical study of Tosedostat,  
1319 an inhibitor of aminopeptidases, in patients with acute myeloid leukemia and myelodysplasia. *J.*  
1320 *Clin. Oncol. Off. J. Am. Soc. Clin. Oncol.* *28*, 4333–4338.
- 1321 Mawad, R., Becker, P.S., Hendrie, P., Scott, B., Wood, B.L., Dean, C., Sandhu, V., Deeg, H.J.,  
1322 Walter, R., Wang, L., et al. (2016). Phase II study of tosedostat with cytarabine or decitabine in  
1323 newly diagnosed older patients with acute myeloid leukaemia or high-risk MDS. *Br. J. Haematol.*  
1324 *172*, 238–245.
- 1325 McDonald, E.R., de Weck, A., Schlabach, M.R., Billy, E., Mavrakis, K.J., Hoffman, G.R., Belur, D.,  
1326 Castelletti, D., Frias, E., Gampa, K., et al. (2017). Project DRIVE: A Compendium of Cancer  
1327 Dependencies and Synthetic Lethal Relationships Uncovered by Large-Scale, Deep RNAi  
1328 Screening. *Cell* *170*, 577–592.e10.
- 1329 Menzies, F.M., Hourez, R., Imarisio, S., Raspe, M., Sadiq, O., Chandraratna, D., O’Kane, C., Rock,  
1330 K.L., Reits, E., Goldberg, A.L., et al. (2010). Puromycin-sensitive aminopeptidase protects against  
1331 aggregation-prone proteins via autophagy. *Hum. Mol. Genet.* *19*, 4573–4586.
- 1332 Mills, R.E., Pittard, W.S., Mullaney, J.M., Farooq, U., Creasy, T.H., Mahurkar, A.A., Kemeza, D.M.,  
1333 Strassler, D.S., Ponting, C.P., Webber, C., et al. (2011). Natural genetic variation caused by small  
1334 insertions and deletions in the human genome. *Genome Res.* *21*, 830–839.
- 1335 Mullenders, J., de Jongh, E., Brousal, A., Roosen, M., Blom, J.P.A., Begthel, H., Korving, J.,  
1336 Jonges, T., Kranenburg, O., Meijer, R., et al. (2019). Mouse and human urothelial cancer  
1337 organoids: A tool for bladder cancer research. *Proc. Natl. Acad. Sci. U. S. A.* *116*, 4567–4574.
- 1338 Nadal, R., and Bellmunt, J. (2019). Management of metastatic bladder cancer. *Cancer Treat.*  
1339 *Rev.* *76*, 10–21.
- 1340 Nemkov, T., D’Alessandro, A., and Hansen, K.C. (2015). Three-minute method for amino acid  
1341 analysis by UHPLC and high-resolution quadrupole orbitrap mass spectrometry. *Amino Acids* *47*,  
1342 2345–2357.



- 1343 Nemkov, T., Reisz, J.A., Gehrke, S., Hansen, K.C., and D'Alessandro, A. (2019). High-Throughput  
1344 Metabolomics: Isocratic and Gradient Mass Spectrometry-Based Methods. *Methods Mol. Biol.*  
1345 Clifton NJ 1978, 13–26.
- 1346 Okonechnikov, K., Conesa, A., and García-Alcalde, F. (2016). Qualimap 2: advanced multi-  
1347 sample quality control for high-throughput sequencing data. *Bioinforma. Oxf. Engl.* 32, 292–  
1348 294.
- 1349 Olivieri, M., Cho, T., Álvarez-Quilón, A., Li, K., Schellenberg, M.J., Zimmermann, M., Hustedt, N.,  
1350 Rossi, S.E., Adam, S., Melo, H., et al. (2020). A Genetic Map of the Response to DNA Damage in  
1351 Human Cells. *Cell* 182, 481-496.e21.
- 1352 Osada, T., Ikegami, S., Takiguchi-Hayashi, K., Yamazaki, Y., Katoh-Fukui, Y., Higashinakagawa, T.,  
1353 Sakaki, Y., and Takeuchi, T. (1999). Increased anxiety and impaired pain response in puromycin-  
1354 sensitive aminopeptidase gene-deficient mice obtained by a mouse gene-trap method. *J.*  
1355 *Neurosci. Off. J. Soc. Neurosci.* 19, 6068–6078.
- 1356 Parker, S.J., Rost, H., Rosenberger, G., Collins, B.C., Malmström, L., Amodei, D., Venkatraman,  
1357 V., Raedschelders, K., Van Eyk, J.E., and Aebersold, R. (2015). Identification of a Set of  
1358 Conserved Eukaryotic Internal Retention Time Standards for Data-independent Acquisition  
1359 Mass Spectrometry. *Mol. Cell. Proteomics MCP* 14, 2800–2813.
- 1360 Parker, S.J., Venkatraman, V., and Van Eyk, J.E. (2016). Effect of peptide assay library size and  
1361 composition in targeted data-independent acquisition-MS analyses. *Proteomics* 16, 2221–2237.
- 1362 Patel, V.G., Oh, W.K., and Galsky, M.D. (2020). Treatment of muscle-invasive and advanced  
1363 bladder cancer in 2020. *CA. Cancer J. Clin.*
- 1364 Planells-Cases, R., Lutter, D., Guyader, C., Gerhards, N.M., Ullrich, F., Elger, D.A.,  
1365 Kucukosmanoglu, A., Xu, G., Voss, F.K., Reincke, S.M., et al. (2015a). Subunit composition of  
1366 VRAC channels determines substrate specificity and cellular resistance to Pt-based anti-cancer  
1367 drugs. *EMBO J.* 34, 2993–3008.
- 1368 Planells-Cases, R., Lutter, D., Guyader, C., Gerhards, N.M., Ullrich, F., Elger, D.A.,  
1369 Kucukosmanoglu, A., Xu, G., Voss, F.K., Reincke, S.M., et al. (2015b). Subunit composition of  
1370 VRAC channels determines substrate specificity and cellular resistance to Pt-based anti-cancer  
1371 drugs. *EMBO J.* 34, 2993–3008.
- 1372 Reid, A.H.M., Protheroe, A., Attard, G., Hayward, N., Vidal, L., Spicer, J., Shaw, H.M., Bone, E.A.,  
1373 Carter, J., Hooftman, L., et al. (2009). A First-in-Man Phase I and Pharmacokinetic Study on CHR-  
1374 2797 (Tosedostat), an Inhibitor of M1 Aminopeptidases, in Patients with Advanced Solid  
1375 Tumors. *Clin. Cancer Res.* 15, 4978–4985.
- 1376 Ritchie, M.E., Phipson, B., Wu, D., Hu, Y., Law, C.W., Shi, W., and Smyth, G.K. (2015). limma  
1377 powers differential expression analyses for RNA-sequencing and microarray studies. *Nucleic*  
1378 *Acids Res.* 43, e47.

- 1379 Robertson, A.G., Kim, J., Al-Ahmadie, H., Bellmunt, J., Guo, G., Cherniack, A.D., Hinoue, T., Laird,  
1380 P.W., Hoadley, K.A., Akbani, R., et al. (2017). Comprehensive Molecular Characterization of  
1381 Muscle-Invasive Bladder Cancer. *Cell* *171*, 540-556.e25.
- 1382 Robinson, A.E., Binek, A., Venkatraman, V., Searle, B.C., Holewinski, R.J., Rosenberger, G.,  
1383 Parker, S.J., Basisty, N., Xie, X., Lund, P.J., et al. (2020). Lysine and Arginine Protein Post-  
1384 translational Modifications by Enhanced DIA Libraries: Quantification in Murine Liver Disease. *J.*  
1385 *Proteome Res.* *19*, 4163–4178.
- 1386 Robinson, M.D., McCarthy, D.J., and Smyth, G.K. (2010). edgeR: a Bioconductor package for  
1387 differential expression analysis of digital gene expression data. *Bioinforma. Oxf. Engl.* *26*, 139–  
1388 140.
- 1389 Röst, H.L., Rosenberger, G., Navarro, P., Gillet, L., Miladinović, S.M., Schubert, O.T., Wolski, W.,  
1390 Collins, B.C., Malmström, J., Malmström, L., et al. (2014). OpenSWATH enables automated,  
1391 targeted analysis of data-independent acquisition MS data. *Nat. Biotechnol.* *32*, 219–223.
- 1392 Röst, H.L., Liu, Y., D’Agostino, G., Zanella, M., Navarro, P., Rosenberger, G., Collins, B.C., Gillet,  
1393 L., Testa, G., Malmström, L., et al. (2016). TRIC: an automated alignment strategy for  
1394 reproducible protein quantification in targeted proteomics. *Nat. Methods* *13*, 777–783.
- 1395 Rottenberg, S., Disler, C., and Perego, P. (2021). The rediscovery of platinum-based cancer  
1396 therapy. *Nat. Rev. Cancer* *21*, 37–50.
- 1397 Saric, T., Graef, C.I., and Goldberg, A.L. (2004). Pathway for degradation of peptides generated  
1398 by proteasomes: a key role for thimet oligopeptidase and other metallopeptidases. *J. Biol.*  
1399 *Chem.* *279*, 46723–46732.
- 1400 Schönlein, C., Löffler, J., and Huber, G. (1994). Purification and characterization of a novel  
1401 metalloprotease from human brain with the ability to cleave substrates derived from the N-  
1402 terminus of beta-amyloid protein. *Biochem. Biophys. Res. Commun.* *201*, 45–53.
- 1403 Sergushichev, A.A. (2016). An algorithm for fast preranked gene set enrichment analysis using  
1404 cumulative statistic calculation. *BioRxiv* 060012.
- 1405 Sherry, S.T., Ward, M.H., Kholodov, M., Baker, J., Phan, L., Smigielski, E.M., and Sirotkin, K.  
1406 (2001). dbSNP: the NCBI database of genetic variation. *Nucleic Acids Res.* *29*, 308–311.
- 1407 Sørensen, B.H., Thorsteinsdottir, U.A., and Lambert, I.H. (2014). Acquired cisplatin resistance in  
1408 human ovarian A2780 cancer cells correlates with shift in taurine homeostasis and ability to  
1409 volume regulate. *Am. J. Physiol.-Cell Physiol.* *307*, C1071–C1080.
- 1410 Sørensen, B.H., Nielsen, D., Thorsteinsdottir, U.A., Hoffmann, E.K., and Lambert, I.H. (2016a).  
1411 Downregulation of LRRC8A protects human ovarian and alveolar carcinoma cells against  
1412 Cisplatin-induced expression of p53, MDM2, p21Waf1/Cip1, and Caspase-9/-3 activation. *Am. J.*  
1413 *Physiol.-Cell Physiol.* *310*, C857–C873.

- 1414 Sørensen, B.H., Dam, C.S., Stürup, S., and Lambert, I.H. (2016b). Dual role of LRRC8A-containing  
1415 transporters on cisplatin resistance in human ovarian cancer cells. *J. Inorg. Biochem.* *160*, 287–  
1416 295.
- 1417 Syeda, R., Qiu, Z., Dubin, A.E., Murthy, S.E., Florendo, M.N., Mason, D.E., Mathur, J., Cahalan,  
1418 S.M., Peters, E.C., Montal, M., et al. (2016). LRRC8 Proteins Form Volume-Regulated Anion  
1419 Channels that Sense Ionic Strength. *Cell* *164*, 499–511.
- 1420 Teleman, J., Röst, H.L., Rosenberger, G., Schmitt, U., Malmström, L., Malmström, J., and  
1421 Levander, F. (2015). DIANA--algorithmic improvements for analysis of data-independent  
1422 acquisition MS data. *Bioinforma. Oxf. Engl.* *31*, 555–562.
- 1423 Towne, C.F., York, I.A., Neijssen, J., Karow, M.L., Murphy, A.J., Valenzuela, D.M., Yancopoulos,  
1424 G.D., Neefjes, J.J., and Rock, K.L. (2008). Puromycin-Sensitive Aminopeptidase Limits MHC Class  
1425 I Presentation in Dendritic Cells but Does Not Affect CD8 T Cell Responses during Viral  
1426 Infections. *J. Immunol.* *180*, 1704–1712.
- 1427 Tsherniak, A., Vazquez, F., Montgomery, P.G., Weir, B.A., Kryukov, G., Cowley, G.S., Gill, S.,  
1428 Harrington, W.F., Pantel, S., Krill-Burger, J.M., et al. (2017). Defining a Cancer Dependency Map.  
1429 *Cell* *170*, 564-576.e16.
- 1430 Uhlen, M., Zhang, C., Lee, S., Sjöstedt, E., Fagerberg, L., Bidkhori, G., Benfeitas, R., Arif, M., Liu,  
1431 Z., Edfors, F., et al. (2017). A pathology atlas of the human cancer transcriptome. *Science* *357*.
- 1432 Vale, C.L. (2005). Neoadjuvant Chemotherapy in Invasive Bladder Cancer: Update of a  
1433 Systematic Review and Meta-Analysis of Individual Patient Data: Advanced Bladder Cancer  
1434 (ABC) Meta-analysis Collaboration. *Eur. Urol.* *48*, 202–206.
- 1435 Vallo, S., Michaelis, M., Rothweiler, F., Bartsch, G., Gust, K.M., Limbart, D.M., Rödel, F., Wezel,  
1436 F., Haferkamp, A., and Cinatl, J. (2015). Drug-Resistant Urothelial Cancer Cell Lines Display  
1437 Diverse Sensitivity Profiles to Potential Second-Line Therapeutics. *Transl. Oncol.* *8*, 210–216.
- 1438 Vallo, S., Köpp, R., Michaelis, M., Rothweiler, F., Bartsch, G., Brandt, M.P., Gust, K.M., Wezel, F.,  
1439 Blaheta, R.A., Haferkamp, A., et al. (2017). Resistance to nanoparticle albumin-bound paclitaxel  
1440 is mediated by ABCB1 in urothelial cancer cells. *Oncol. Lett.* *13*, 4085–4092.
- 1441 Voss, F.K., Ullrich, F., Münch, J., Lazarow, K., Lutter, D., Mah, N., Andrade-Navarro, M.A., von  
1442 Kries, J.P., Stauber, T., and Jentsch, T.J. (2014). Identification of LRRC8 heteromers as an  
1443 essential component of the volume-regulated anion channel VRAC. *Science* *344*, 634–638.
- 1444 Wang, K., Li, M., and Hakonarson, H. (2010). ANNOVAR: functional annotation of genetic  
1445 variants from high-throughput sequencing data. *Nucleic Acids Res.* *38*, e164–e164.
- 1446 Wickham, H. (2009). *Ggplot2: elegant graphics for data analysis* (New York: Springer).

- 1447 Winter, J., Breinig, M., Heigwer, F., Brügemann, D., Leible, S., Pelz, O., Zhan, T., and Boutros, M.  
1448 (2016). caRpoools: an R package for exploratory data analysis and documentation of pooled  
1449 CRISPR/Cas9 screens. *Bioinforma. Oxf. Engl.* *32*, 632–634.
- 1450 Witjes, J.A., Bruins, H.M., Cathomas, R., Compérat, E.M., Cowan, N.C., Gakis, G., Hernández, V.,  
1451 Linares Espinós, E., Lorch, A., Neuzillet, Y., et al. (2020). European Association of Urology  
1452 Guidelines on Muscle-invasive and Metastatic Bladder Cancer: Summary of the 2020  
1453 Guidelines. *Eur. Urol.*
- 1454 Yanagi, K., Tanaka, T., Kato, K., Sadik, G., Morihara, T., Kudo, T., and Takeda, M. (2009).  
1455 Involvement of puromycin-sensitive aminopeptidase in proteolysis of tau protein in cultured  
1456 cells, and attenuated proteolysis of frontotemporal dementia and parkinsonism linked to  
1457 chromosome 17 (FTDP-17) mutant tau. *Psychogeriatrics* *9*, 157–166.
- 1458 Yu, G., Wang, L.-G., Han, Y., and He, Q.-Y. (2012). clusterProfiler: an R Package for Comparing  
1459 Biological Themes Among Gene Clusters. *OMICS J. Integr. Biol.* *16*, 284–287.
- 1460 Zhou, Y., Zhou, B., Pache, L., Chang, M., Khodabakhshi, A.H., Tanaseichuk, O., Benner, C., and  
1461 Chanda, S.K. (2019). Metascape provides a biologist-oriented resource for the analysis of  
1462 systems-level datasets. *Nat. Commun.* *10*, 1523.
- 1463 (2018). Picard toolkit (Broad Institute).
- 1464
- 1465

1466 **Figure Legends**

1467

1468 **Figure 1. Project overview and synthetic lethal screen results.** (A) Human bladder cancer  
1469 cell lines were made resistant to cisplatin, gemcitabine, or gemcitabine plus cisplatin through  
1470 dose escalation. All cell lines were profiled using -omic technologies. The gemcitabine plus  
1471 cisplatin resistant cells were subjected to a pooled CRISPR screen to identify synthetic lethal  
1472 gene-to-drug relationships. (B) Aggregate gene set enrichment results for the synthetic lethal  
1473 screen results across all cell lines reveal DNA damage response and repair pathways. Each tick  
1474 mark represents a gene in the associated pathway. The bars are normalized enrichment scores  
1475 (NES) with the FDR corrected p-values reported in the bars. (C) When results from all cell lines  
1476 were evaluated individually, a total of 46 commonly synthetic lethal genes were identified; all  
1477 counts are reported in **Figure S2**. (D) The percentage change in the aggregate of the sgRNAs  
1478 targeting the 46 commonly synthetic lethal genes are reported across saline (PBS) or  
1479 gemcitabine plus cisplatin treatment arms of the CRISPR screen.

1480

1481 **Figure 2. NPEPPS is identified as a commonly upregulated and synthetic lethal hit.** (A)  
1482 Differential gene expression of the 46 common synthetic lethal genes as measured by RNAseq  
1483 across all cell lines, comparing the treatment resistant derivative (Gem-, Cis-, GemCis-resistant)  
1484 to the associated parental cell line. Asterisks indicate a statistically significant result (moderated  
1485 t-test, \*FDR < 0.05). The top bar plot is the aggregate count of significant results across all 15  
1486 comparisons. Genes are ranked by the count of statistically significant upregulated hits. (B)  
1487 RNAseq (compared to parentals; \*FDR < 0.05), (C) mass spectrometry proteomics (compared  
1488 to parentals, \*FDR < 0.25), and (D) CRISPR screen results (\*FDR < 0.05) for NPEPPS. (E)  
1489 Representative immunoblots and densitometry quantification for independent triplicates (mean  $\pm$   
1490 SEM) for NPEPPS in all cell lines (\*FDR < 0.05).

1491

1492 **Figure 3. Genetic and pharmacological inhibition of NPEPPS resensitizes GemCis-**  
1493 **resistant cells.** (A) NPEPPS was found to be synthetic lethal with cisplatin in a CRISPR screen  
1494 for 27 genotoxic agents in RPE1 cells by (Olivieri et al., 2020). (B) Immunoblot for NPEPPS  
1495 across several control and shRNAs targeting NPEPPS. (C, D) KU1919-GemCis cells with  
1496 knockdown of NPEPPS treated with increasing doses of cisplatin or gemcitabine. A total of 3  
1497 technical replicates per dose (mean  $\pm$  SEM). Independent experiments are reported in **Figure**  
1498 **S5**. (E) NPEPPS mRNA is upregulated in response to cisplatin treatment in a dose dependent  
1499 manner if both KU1919 parental and GemCis-resistant cells. Independent triplicate experiments  
1500 are shown (mean  $\pm$  SEM) (t-test compared to 0 $\mu$ M; \*p < 0.05, \*\*p < 0.05). (F) Pharmacologic  
1501 targeting of NPEPPS with tosedostat in GemCis-resistant cells treated with cisplatin,  
1502 gemcitabine, and gemcitabine plus cisplatin treatment. A total of 3 technical replicates per dose  
1503 are shown (mean  $\pm$  SEM). Independent experiments are reported in **Figure S6**.

1504

1505 **Figure 4. NPEPPS interacts with volume regulated anion channel (VRAC) subunits**  
1506 **LRRC8A and LRRC8D to mediate cisplatin response.** (A) NPEPPS is found to interact with  
1507 all VRAC subunits, LRRC8A-E, using the BioPlex interactome (Huttlin et al., 2020). (B, C)  
1508 Knockout of LRRC8A and LRRC8D through the CRISPR screen resulted in increased cell  
1509 growth upon gemcitabine plus cisplatin treatment in GemCis-resistant cell lines (moderated t-  
1510 test; \*FDR < 0.05). (D) Genes ranked based on log<sub>2</sub> fold change from the synthetic lethal  
1511 CRISPR screens across all cell lines. LRRC8A-E and the 46 common synthetic lethal genes are  
1512 labeled. (E, F) LRRC8A and LRRC8D gene expression measured by RNAseq (compared to  
1513 parentals; \*FDR < 0.05). (G) Volcano plot of metabolites measured from KU1919-GemCis cells  
1514 with or without NPEPPS knockdown (shN39). Time and treatment (cisplatin 10 $\mu$ M) were  
1515 covariates in the linear model to calculate differential expression using a moderated t-test;



1516 horizontal grey line is  $-\log_{10}(\text{FDR} = 0.05)$ . (H) Taurine abundance measured in KU1919-GemCis  
1517 cells with non-targeting shRNA controls or shRNA targeting NPEPPS. Cells were also  
1518 measured at 48 hours with cisplatin treatment or PBS, vehicle control. (I) Intracellular cisplatin  
1519 levels were measured after 4 hours of treatment at  $10\mu\text{M}$  cisplatin using CyTOF, with the  
1520 number of cells analyzed as indicated. The median Pt 195 measurement for the KU1919-  
1521 parental line = 158, for the KU1919-GemCis line = 44.5, and for the KU1919-GemCis- shN39  
1522 line = 77. (J) Immunoblot of LRRC8A, LRRC8D, and  $\gamma\text{H2AX}$  in KU1919-GemCis-shCtrl1 and  
1523 KU1919-GemCis-shN39 cells treated with PBS or  $10\mu\text{M}$  cisplatin for 38 hours.  
1524

1525 **Figure 5. Genetic and pharmacological inhibition of NPEPPS resensitizes *in vivo* and *ex***  
1526 ***vivo* models of bladder cancer to cisplatin-based chemotherapy.** (A) Tumor volume of  
1527 KU1919-GemCis xenografts measured over time and across 4 treatment groups considering  
1528 non-targeting shRNA controls (shCtrl1), shRNA targeting NPEPPS (shN39), PBS vehicle control  
1529 (PBS), or gemcitabine plus cisplatin treatment (GemCis). (B) Survival analysis of xenograft  
1530 models with a defined endpoint of a tumor volume  $> 2\text{cm}^3$ . Logrank test was applied to test  
1531 significance. (C, D, E) Patient tumor-derived organoids were derived from patient tumors that  
1532 did not respond to gemcitabine plus cisplatin chemotherapy. Organoids were treated for 6 days,  
1533 allowed to recover for 10 days, then reseeded at different ratios depending on overall growth,  
1534 then allowed to grow for an additional 6 days. Cell viability was quantified in triplicate after  
1535 reseeding (t-test; \*  $p < 0.05$ , \*\*  $p < e^{-3}$ , \*\*\*  $p < e^{-5}$ ). (F) Survival analysis of muscle-invasive bladder  
1536 cancer in the TCGA stratified based on copy number amplification, gain or overexpression of  
1537 LRRC8A or LRRC8D. Patients all had a record of cisplatin-based chemotherapy treatment. (G)  
1538 Survival analysis for patients stratified by LRRC8A or LRRC8D as in (F), but did not have any  
1539 record of cisplatin-based treatments.  
1540

1541 **Figure 6. Proposed model of NPEPPS-mediated cisplatin resistance.** Normal functioning  
1542 cells will import cisplatin through the volume regulated anion channels (VRAC), with LRRC8A  
1543 and LRRC8D being the primary subunits. A mechanism of cisplatin resistance is to have  
1544 inherently down-regulated VRACs. We propose that NPEPPS interacts with LRRC8A or  
1545 LRRC8D directly to decrease VRAC activity, which prevents export of taurine and import of  
1546 cisplatin, hence driving cisplatin resistance.  
1547

1548 **Figure S1. Dose response for all cell line derivatives.** Parental, cisplatin-resistant,  
1549 gemcitabine-resistant, and gemcitabine plus cisplatin (GemCis)-resistant cells for each of the  
1550 five bladder cancer cell lines were treated with increasing doses of cisplatin or gemcitabine.  
1551 Dose response curves were calculated. The resistant derivative lines were more resistant to the  
1552 associated drug. Data represent a single experiment with each condition measured in technical  
1553 triplicate wells (mean  $\pm$  SEM).  
1554

1555 **Figure S2. Venn diagram of synthetic lethal genes.** The number of genes that were  
1556 statistically significantly synthetic lethal (FDR  $< 0.05$ ) are reported.  
1557

1558 **Figure S3. Resistance mechanisms of gemcitabine.** (A) Gemcitabine is processed through  
1559 several mechanisms to have its downstream treatment impact, leading to chain termination,  
1560 impaired DNA repair, and finally apoptosis. Deoxycytidine kinase (DCK) and ribonucleotide  
1561 reductase subunit M1 (RRM1) are known mechanisms of gemcitabine resistance. (B) Transcript  
1562 and protein expression are reported for both genes (ND = not detected; \*FDR  $< 0.01$ ). In  
1563 addition, copy number results are shown for all cell lines.  
1564

1565 **Figure S4. Synthetic lethal screen comparison.** (A) The results from the CRISPR screen  
1566 reported in this study were correlated with the synthetic lethal screen results for 27 genotoxic  
1567 agents from (Olivieri et al., 2020). The screen results from the five cell lines reported here are  
1568 highlighted by the black box and were highly correlated. The drug that was most correlated with  
1569 our screen results was cisplatin. (B) The synthetic lethal results for the top 46 hits reported here  
1570 are shown including results from the Olivieri et al dataset. 42 genes are reported as four genes  
1571 did not map to the Olivieri et al dataset. The synthetic lethal scores were z-score normalized for  
1572 display purposes and show that the 42 genes were also synthetic lethal in the three cisplatin  
1573 screens, but not in the gemcitabine screen.

1574  
1575 **Figure S5. shRNA and siRNA targeting NPEPPS resensitizes to cisplatin and gemcitabine  
1576 plus cisplatin.** (A) Dose response for shRNA targeting NPEPPS (shN38 = TRCN0000073838;  
1577 shN39 = TRCN0000073839; shN40 = TRCN0000073840) or non-targeting controls (shCtrl1 =  
1578 MISSION pLKO.1-puro Non-Mammalian shRNA Control; shCtrl2 = MISSION pLKO.1-puro Non-  
1579 Target shRNA Control). Cells were treated with cisplatin or gemcitabine separately. Data for  
1580 KU1919 shown from two independent experiments with 3 technical replicates per dose (mean  $\pm$   
1581 SEM). Data from 253J represent a single experiment with 3 technical replicate wells per dose  
1582 (mean  $\pm$  SEM). (B) Immunoblot analysis of NPEPPS protein across the different shRNAs and  
1583 cell lines. (C) Cell confluency was measured using Incucyte Zoom across untransfected cells,  
1584 siRNA controls (siCtrl), and siRNA transfected cells targeting NPEPPS. Cells were treated with  
1585 PBS or gemcitabine plus cisplatin (GemCis) at the resistant doses for each cell line (**Table S1**).  
1586 Data shown represent a single experiment with 3 technical replicates (mean  $\pm$  SEM) per  
1587 timepoint represented.

1588  
1589 **Figure S6. Response to tosedostat in combination with gemcitabine, cisplatin, or  
1590 gemcitabine plus cisplatin.** Dose response curves for serial increased doses of tosedostat at  
1591 120 hours at the associated resistant doses of gemcitabine or cisplatin for each cell line (**Table  
1592 S1**). Data represent triplicate wells per dose, per experiment (mean  $\pm$  SEM).

1593  
1594  
1595 **Figure S7. LRRC8D gene expression and copy number alterations.** Gene expression shows  
1596 that LRRC8D is not detected in the TCCSUP-Cis and TCCSUP-GemCis cell lines. This result is  
1597 supported by a focal copy number deletion detected using WES data that is specific to the  
1598 TCCSUP-Cis and TCCSUP-GemCis cell lines (\*FDR < 0.01).

1599  
1600 **Figure S8. Intracellular cisplatin measured using CyTOF.** KU1919-Parental, KU1919-  
1601 GemCis and KU1919-GemCis-shN39 cells were treated with PBS vehicle (0 $\mu$ M) or 10 $\mu$ M  
1602 cisplatin for 4 hours and then intracellular cisplatin was measured using cytometry by time of  
1603 flight (CyTOF). Results from (A) replicate 1 and (B) replicate 2 are shown. (C) Immunoblotting  
1604 for  $\gamma$ H2AX, LRRC8A, and LRRC8D were performed in KU1919-GemCis-shCtrl1 or KU1919-  
1605 GemCis-shN39 cells after 48 hours of treatment with 10 $\mu$ M cisplatin or PBS vehicle control. This  
1606 is an independent replicate from the immunoblot reported in **Figure 4J**.

1607  
1608 **Figure S9. Xenograft tumor growth modeling and validation.** (A) Fixed effects population-  
1609 level model fit (thick lines) overlaid on top of the observations (grey lines). Longitudinal tumor  
1610 volumes were divided by the baseline tumor volume and then log<sub>2</sub>-transformed before  
1611 modelling. (B) Residuals for the final mixed-effects model (y-axis) coupled with the original  
1612 observations (x-axis). No systematic trends were detected in model diagnostics, suggesting that  
1613 the single fitted model successfully captured variation over the treatment arms and individuals.  
1614 (C) Immunoblot on the left is from KU1919-GemCis cells that were injected into mice to

1615 establish tumors. Immunoblot on the right are from tumor samples after mice met the endpoint  
1616 of the experiment of  $> 2\text{cm}^3$ .

1617  
1618 **Figure S10. Patient tumor-derived organoids generated from muscle-invasive bladder**  
1619 **cancer patients treated with platinum-based chemotherapy.** (A) Clinical time course of  
1620 muscle-invasive bladder cancer patients from whom patient tumor-derived organoid lines were  
1621 initiated after radical cystectomy. Patients are not lost to follow-up but censored, at the time of  
1622 publication. TURBT = transurethral resection of bladder tumor. (B) Bright-field images of  
1623 organoids together with H&E staining of patient tumors and organoids. (C) SNaPshot mutation  
1624 analysis of patient tumors and organoids on hotspot mutations in fibroblast growth factor  
1625 receptor 3 (*FGFR3*) or telomerase reverse transcriptase (*TERT*). Copy number plot of the entire  
1626 genome for the primary tumor and organoids from patient 65 demonstrate the genomic similarity  
1627 of the tumor-derived organoids. Intensity values of each bin are plotted as colored dots, with  
1628 each chromosome represented by a different color. (D) Overall experimental design for treating  
1629 the organoids with cisplatin, tosedostat, or the combination cisplatin plus tosedostat. Organoids  
1630 were withdrawn from treatment after 6 days of treatment and reseeded after 16 days of  
1631 treatment. Cell viability was measured using alamarBlue.

1632  
1633 **Figure S11. Patient tumor-derived organoids derived from patient 1 and treated with**  
1634 **tosedostat and/or cisplatin.** (A) Organoids were treated for 6 days at the indicated  
1635 concentrations of drug. Cell viability was quantified using alamarBlue. (B) Organoids were then  
1636 withdrawn from treatment for 10 days and assayed again for cell viability using alamarBlue. (C)  
1637 Organoids were reseeded and allowed to regrow for 6 days and cell viability was tested using  
1638 alamarBlue. (D) Comparison of tosedostat doses over the course of treatment and withdrawal.  
1639 All comparisons were done in triplicate (t-test; \*  $p < 0.05$ , \*\* $p < e^{-3}$ , \*\*\* $p < e^{-5}$ ).

1640  
1641 **Figure S12. Patient tumor-derived organoids derived from patient 2 and treated with**  
1642 **tosedostat and/or cisplatin.** (A) Organoids were treated for 6 days at the indicated  
1643 concentrations of drug. Cell viability was quantified using alamarBlue. (B) Organoids were then  
1644 withdrawn from treatment for 10 days and assayed again for cell viability using alamarBlue. (C)  
1645 Organoids were reseeded and allowed to regrow for 6 days and cell viability was tested using  
1646 alamarBlue. All comparisons were done in triplicate (t-test; \*  $p < 0.05$ , \*\* $p < e^{-3}$ , \*\*\* $p < e^{-5}$ ).

1647  
1648  
1649 **Figure S13. Patient tumor-derived organoids derived from patient 3 and treated with**  
1650 **tosedostat and/or cisplatin.** (A) Organoids were treated for 6 days at the indicated  
1651 concentrations of drug. Cell viability was quantified using alamarBlue. (B) Organoids were then  
1652 withdrawn from treatment for 10 days and assayed again for cell viability using alamarBlue. (C)  
1653 Organoids were reseeded and allowed to regrow for 6 days and cell viability was tested using  
1654 alamarBlue. All comparisons were done in triplicate (t-test; \*  $p < 0.05$ , \*\* $p < e^{-3}$ , \*\*\* $p < e^{-5}$ ).

1655  
1656

## Tables

| Feature        | KU1919 | T24    | TCCSUP | 5637    | 253J   |
|----------------|--------|--------|--------|---------|--------|
| Sex            | Male   | Female | Female | Male    | Female |
| Stage          | T3     | Ta     | N/A    | N/A     | T4     |
| Grade          | G3     | G3     | G4     | G2      | G4     |
| Base47 Subtype | N/A    | Basal  | Basal  | Luminal | Basal  |
| TP53           |        | Y126X  | E349X  |         |        |
| HRAS           |        | G12V   |        |         |        |

|               |             |                   |        |        |       |
|---------------|-------------|-------------------|--------|--------|-------|
| <b>NRAS</b>   | Q61R        |                   |        |        |       |
| <b>PIK3CA</b> |             |                   | E545K  |        | E545G |
| <b>TERT</b>   |             |                   |        |        |       |
| <b>ARID1A</b> | Y1052X      |                   |        |        |       |
| <b>KMT2D</b>  | T2441Pfs*44 |                   |        | Q2813X |       |
| <b>KDM6A</b>  | Q915X       |                   |        |        |       |
| <b>FAT1</b>   |             | S2682X            | D1536N |        |       |
| <b>KMT2C</b>  |             | R4225X;<br>A3559T |        |        |       |
| <b>ERBB2</b>  |             |                   |        | S310F  |       |
| <b>ERBB3</b>  |             | E1219K            |        |        |       |
| <b>EP300</b>  |             | C1201Y            |        |        |       |
| <b>FBXW7</b>  |             |                   | S66X   |        |       |
| <b>ASXL2</b>  |             |                   | E330Q  |        |       |
| <b>ATM</b>    |             |                   |        | H1876Q |       |
| <b>AKT1</b>   | E17K        |                   |        |        |       |
| <b>RYR2</b>   |             | R2401H            |        |        |       |
| <b>NFE2L2</b> |             |                   |        |        | G81S  |
| <b>RB1</b>    |             |                   | LOSS   | Y325X  |       |
| <b>E2F3</b>   |             |                   | AMP    | AMP    |       |
| <b>PPARG</b>  |             |                   |        | AMP    |       |
| <b>CCND1</b>  | AMP         |                   |        |        |       |
| <b>CDKN2A</b> | LOSS        |                   |        |        | LOSS  |

1657 **Table 1.** Clinicopathologic characteristics and genetic drivers for five cell lines.

## Figure 1

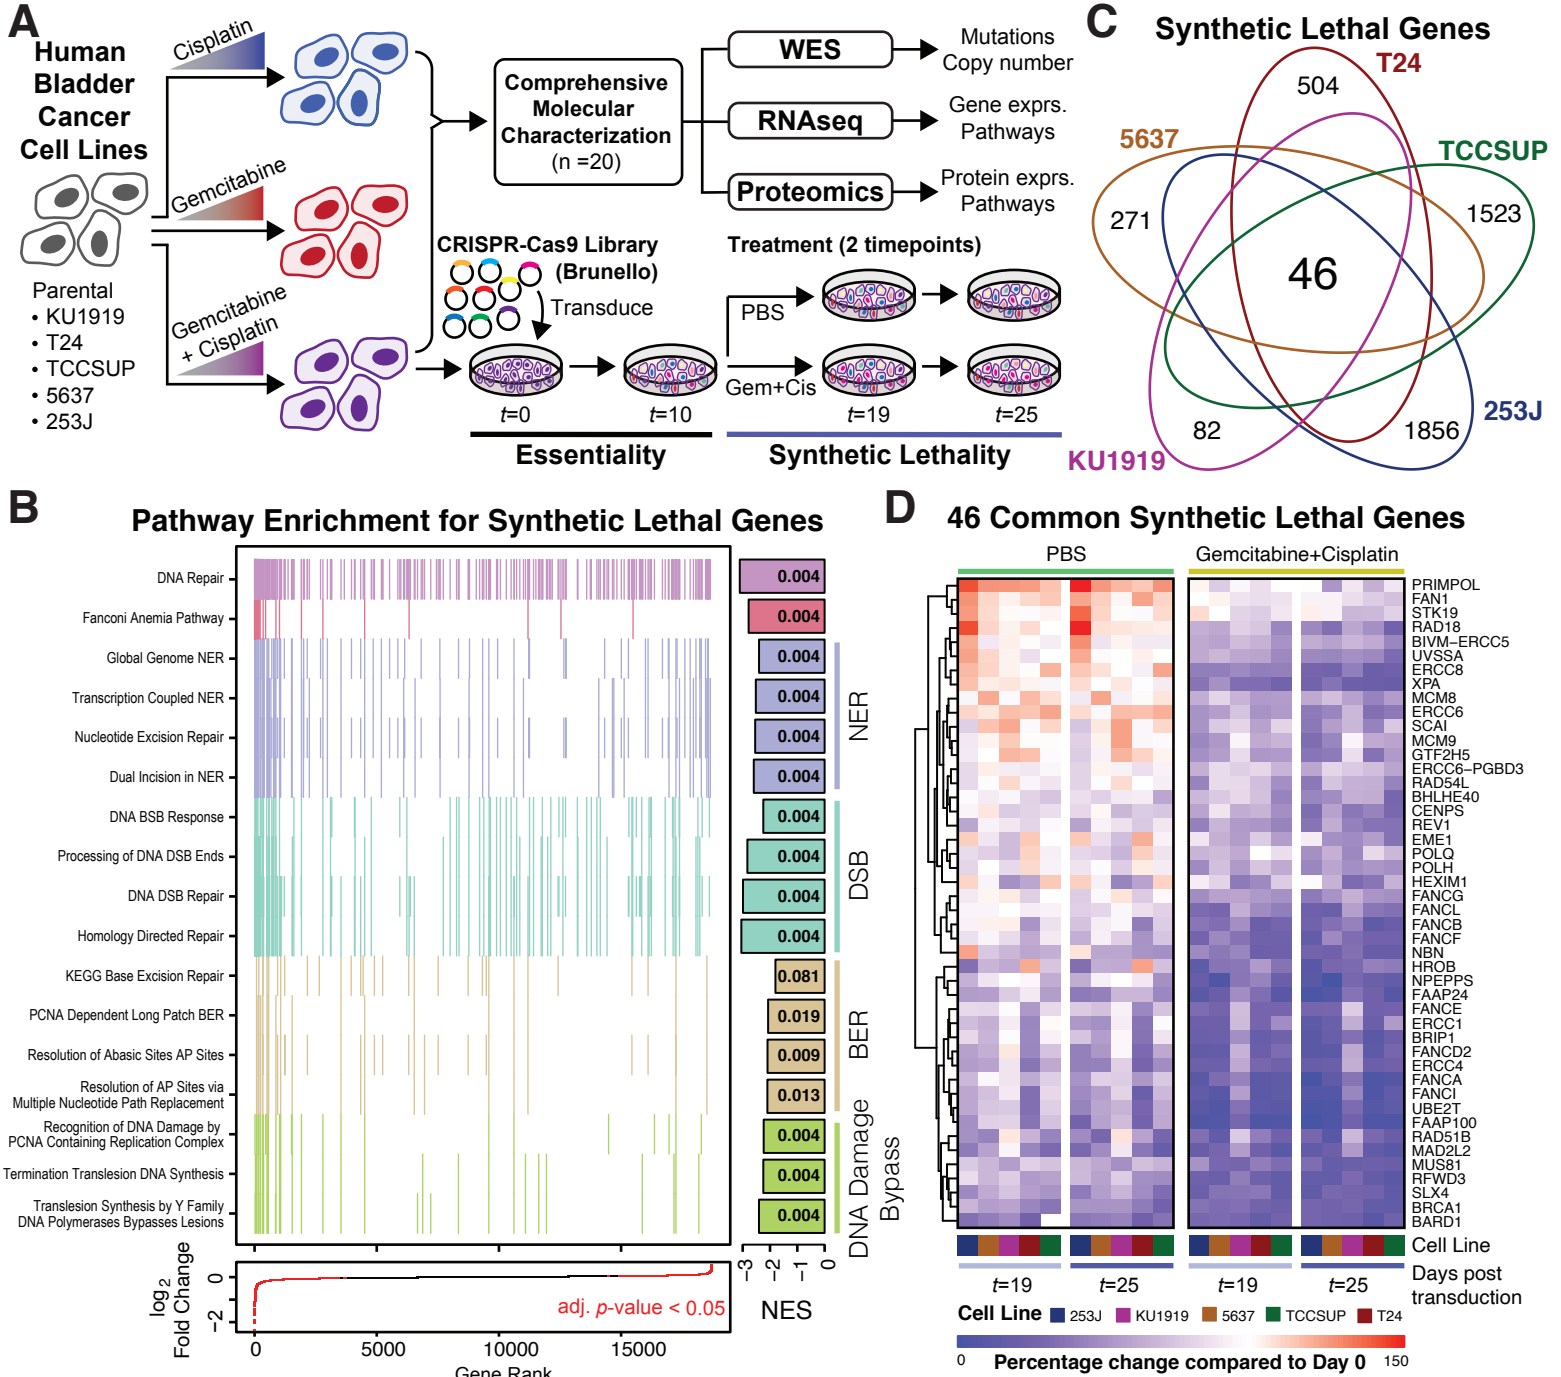



**Figure 2**

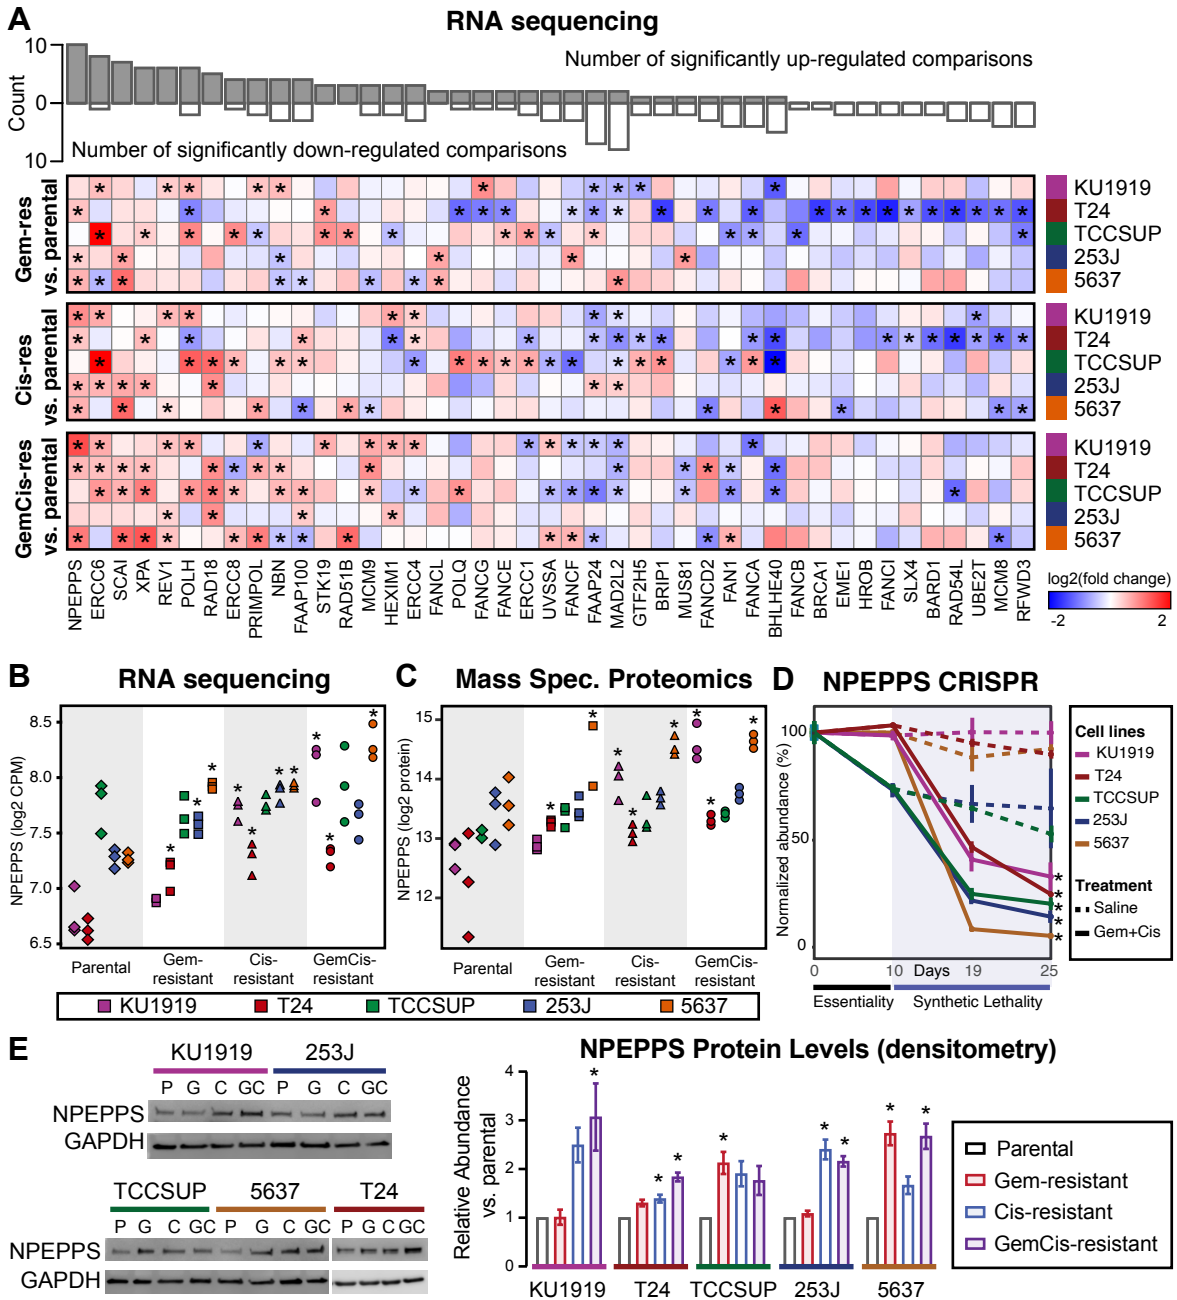

## Figure 3

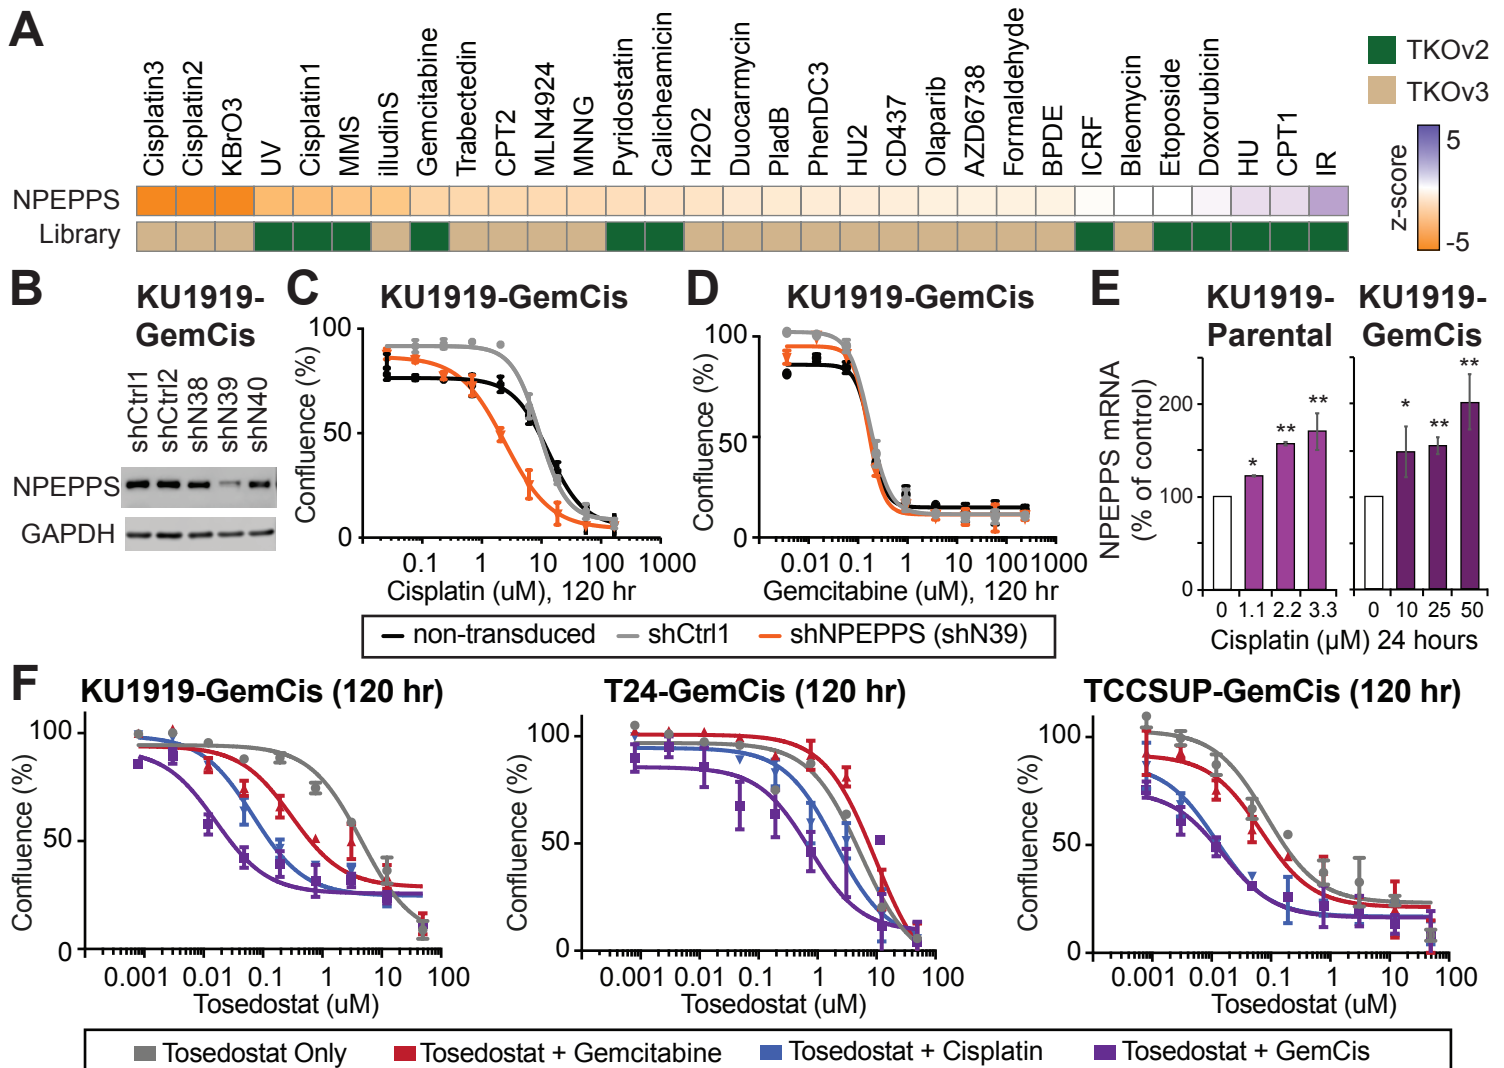

**Figure 4**

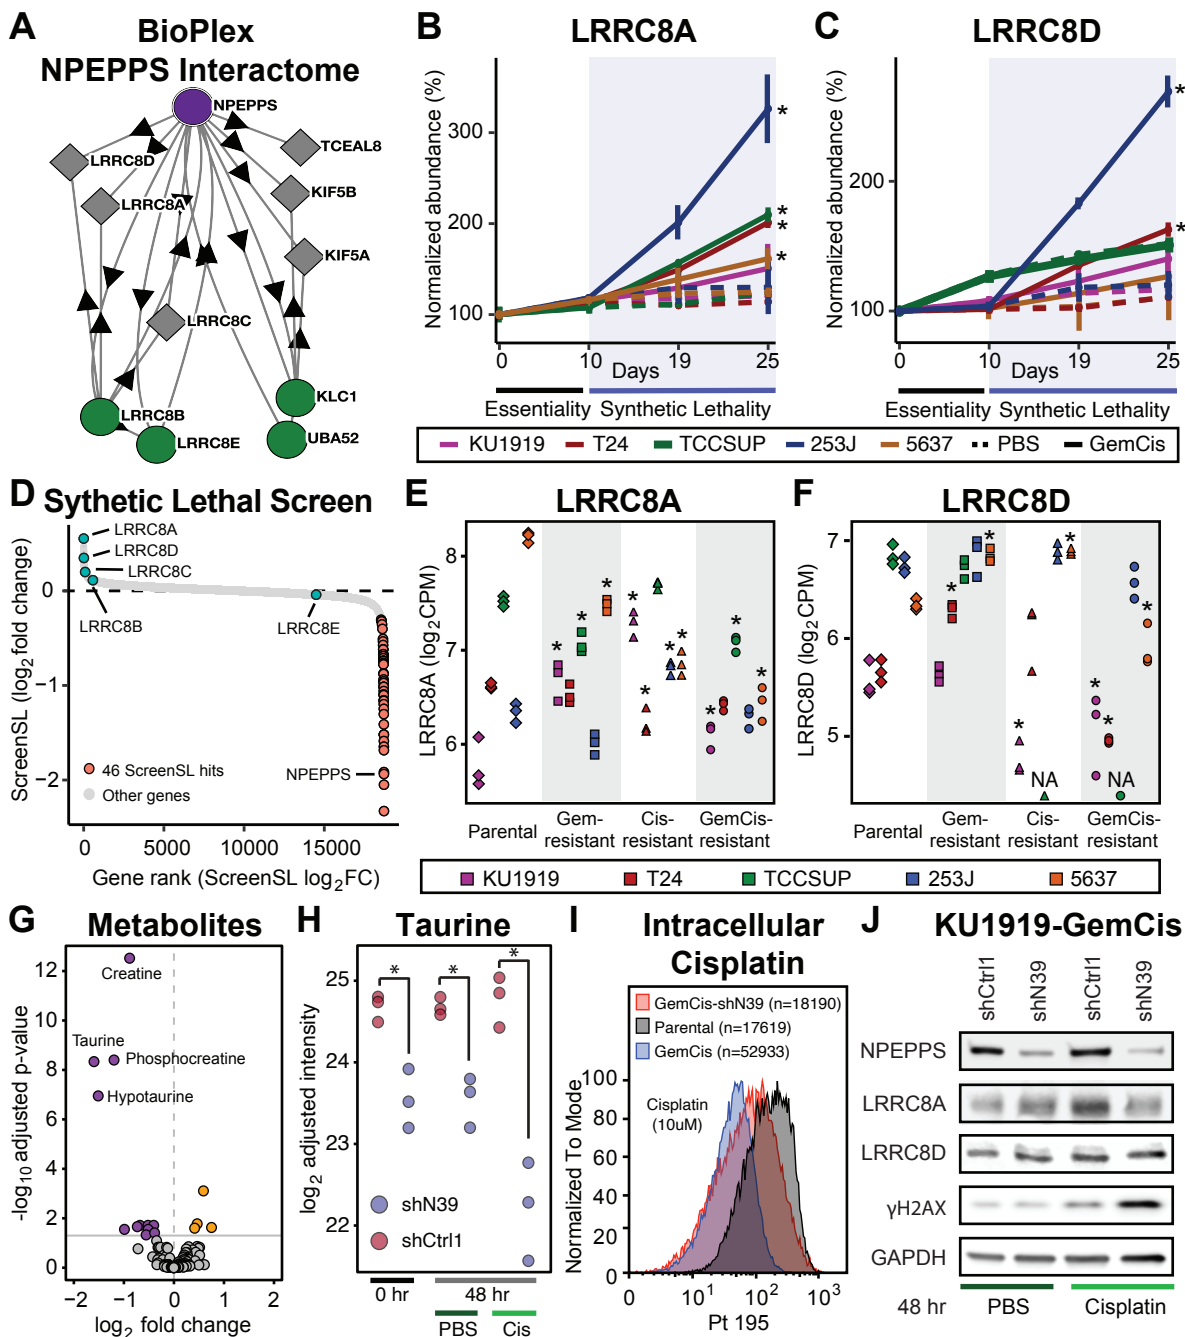

**Figure 5**

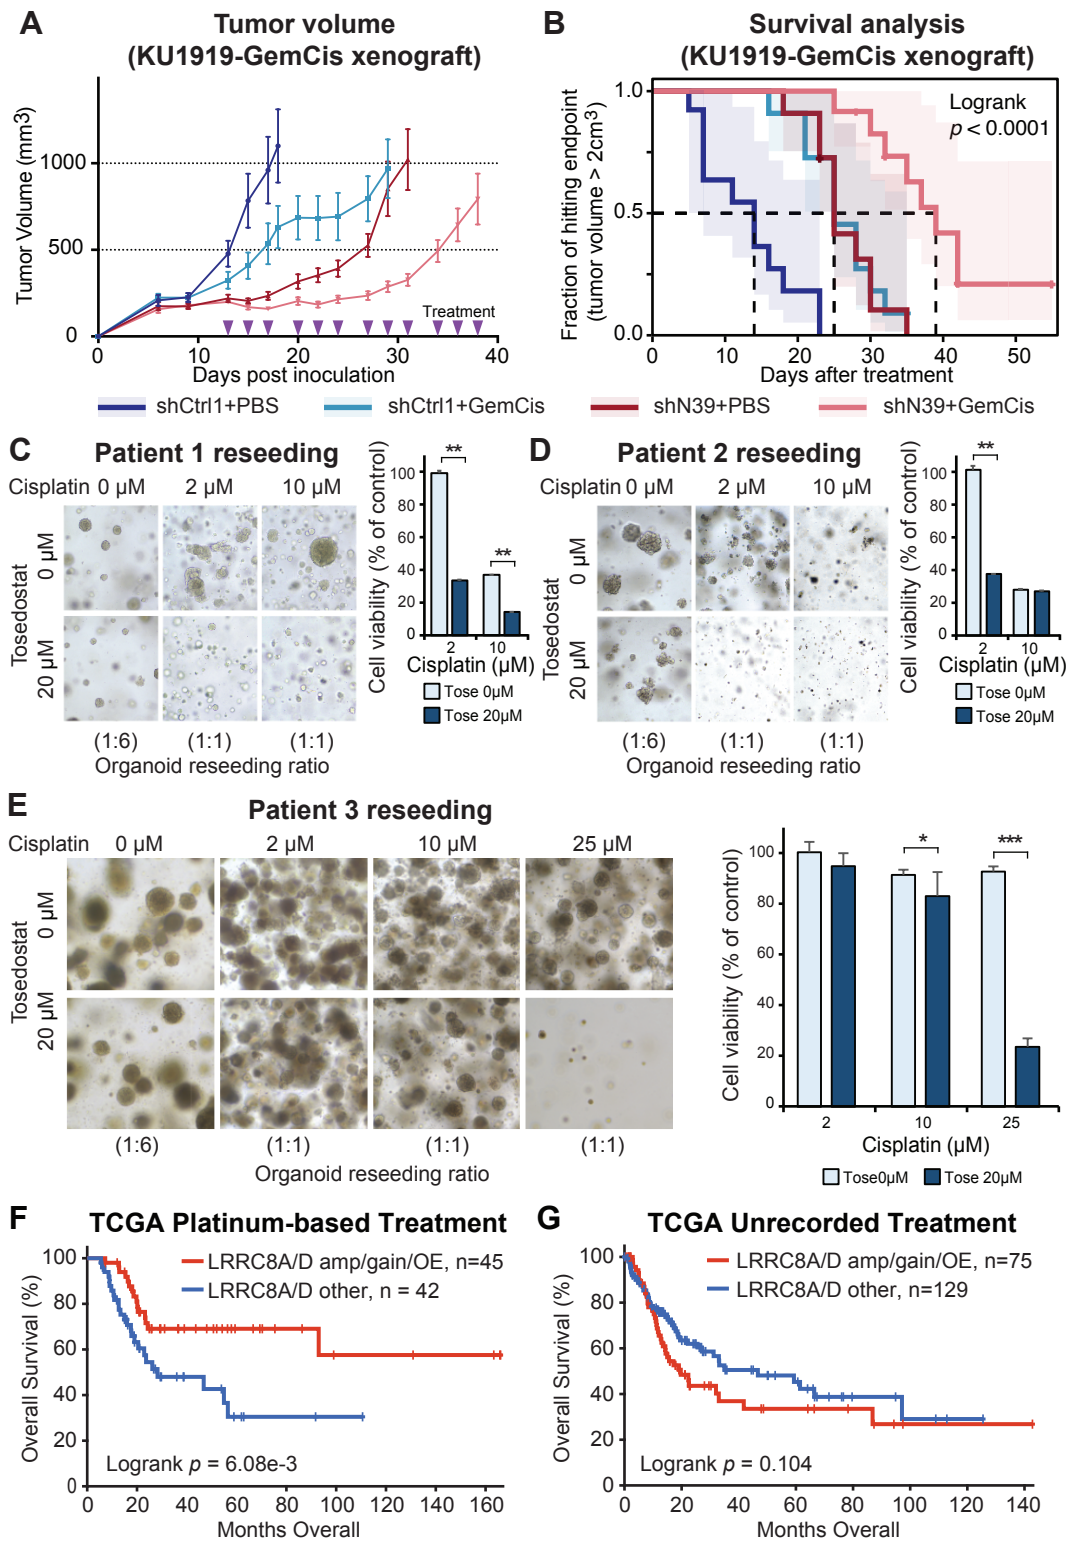

Figure 6

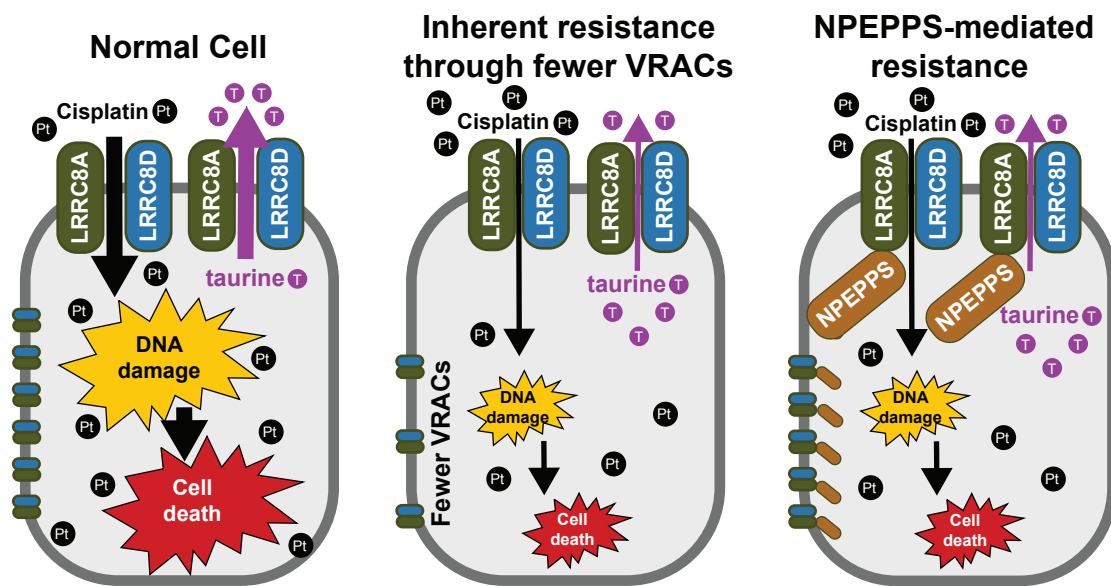

Source: https://biorxiv.org/content/10.1101/2021.03.04.433676v1.full.pdf
